# Supplementary material for: (±)-Camphor-10-sulfonic acid catalyzed direct one-pot three-component Mannich type reaction of alkyl (hetero)aryl ketones under solvent-free conditions: application to the synthesis of aminochromans
Source: Royal Society of Chemistry journal article supplement (doi:10.1039/c1ra00652e), 2011-11-10
Supplement: c1ra00652e.pdf [file c1ra00652e.pdf]

**(±)-Camphor-10-sulfonic acid catalyzed direct one-pot three-component Mannich type reaction of alkyl (hetero)aryl ketones under solvent-free conditions: Application to the synthesis of aminochromans**

**Kshama Kundu and Sandip K. Nayak\***

Bio-Organic Division, Bhabha Atomic Research Centre, Mumbai – 400085, India

Tel: +91-22-25592410; Fax: +91-22-25505151; e-mail: [sknayak@barc.gov.in](mailto:sknayak@barc.gov.in)

**Supporting Information**

**List of Contents**

**(I) <sup>1</sup>H and <sup>13</sup>C Spectra**

|                 |         |
|-----------------|---------|
| <b>4a</b> ..... | S3-S4   |
| <b>4b</b> ..... | S5-S6   |
| <b>4c</b> ..... | S7-S8   |
| <b>4d</b> ..... | S9-S10  |
| <b>4e</b> ..... | S11-S12 |
| <b>4f</b> ..... | S13-S14 |
| <b>4g</b> ..... | S15-S16 |
| <b>4h</b> ..... | S17-S18 |
| <b>4i</b> ..... | S19-S20 |
| <b>4j</b> ..... | S21-S22 |
| <b>4k</b> ..... | S23-S24 |
| <b>4l</b> ..... | S25-S26 |
| <b>4m</b> ..... | S27-S28 |
| <b>4n</b> ..... | S29-S30 |
| <b>4o</b> ..... | S31-S32 |
| <b>4p</b> ..... | S33-S34 |
| <b>4q</b> ..... | S35-S36 |

|                                           |         |
|-------------------------------------------|---------|
| <b>5a</b> .....                           | S37-S38 |
| <b>5b</b> .....                           | S39-S40 |
| <b>6a</b> .....                           | S41-S42 |
| <b>6b</b> .....                           | S43-S44 |
| <br>                                      |         |
| <b>(II) Crystal Structure of 6a</b> ..... | S45-S54 |

## (I) $^1\text{H}$ NMR and $^{13}\text{C}$ NMR Spectra

### $^1\text{H}$ NMR of 4a

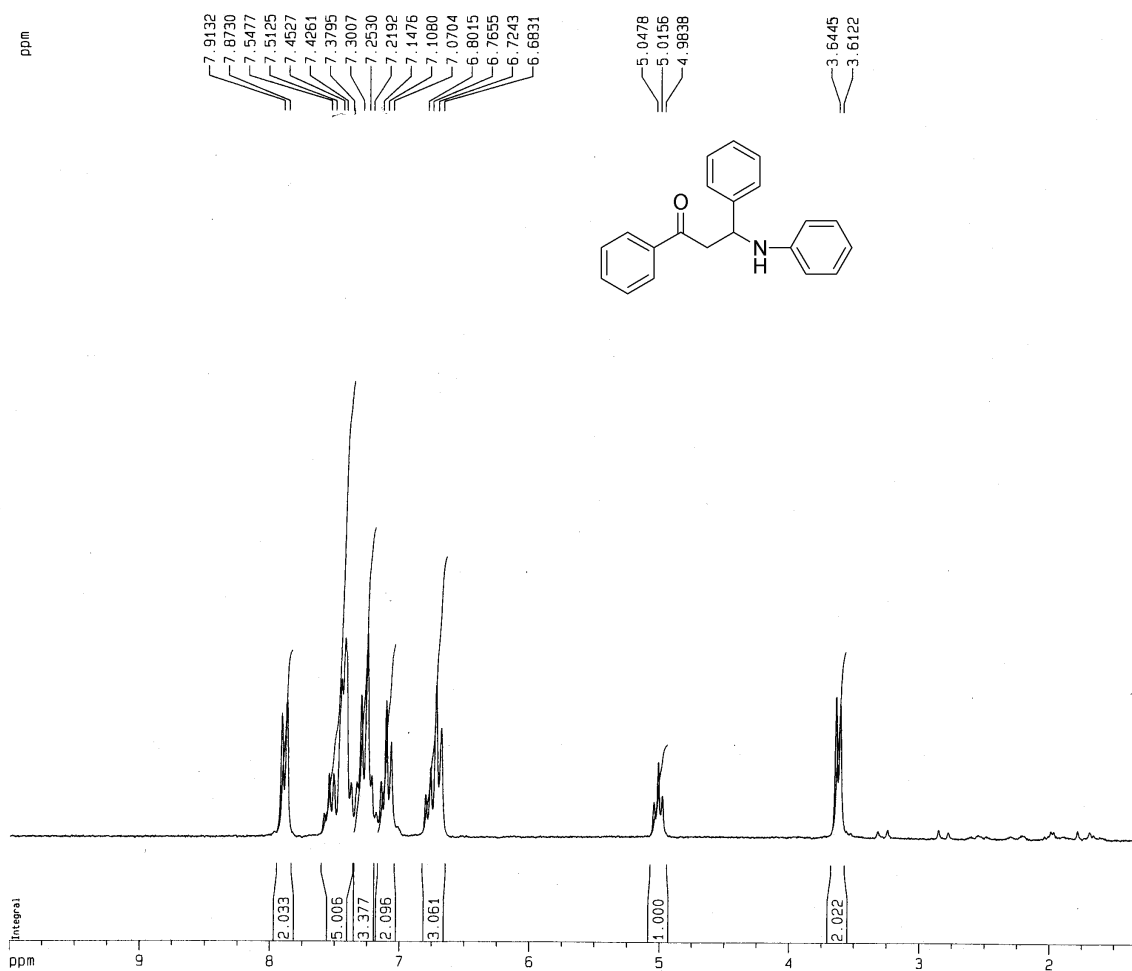

### <sup>13</sup>C NMR of 4a

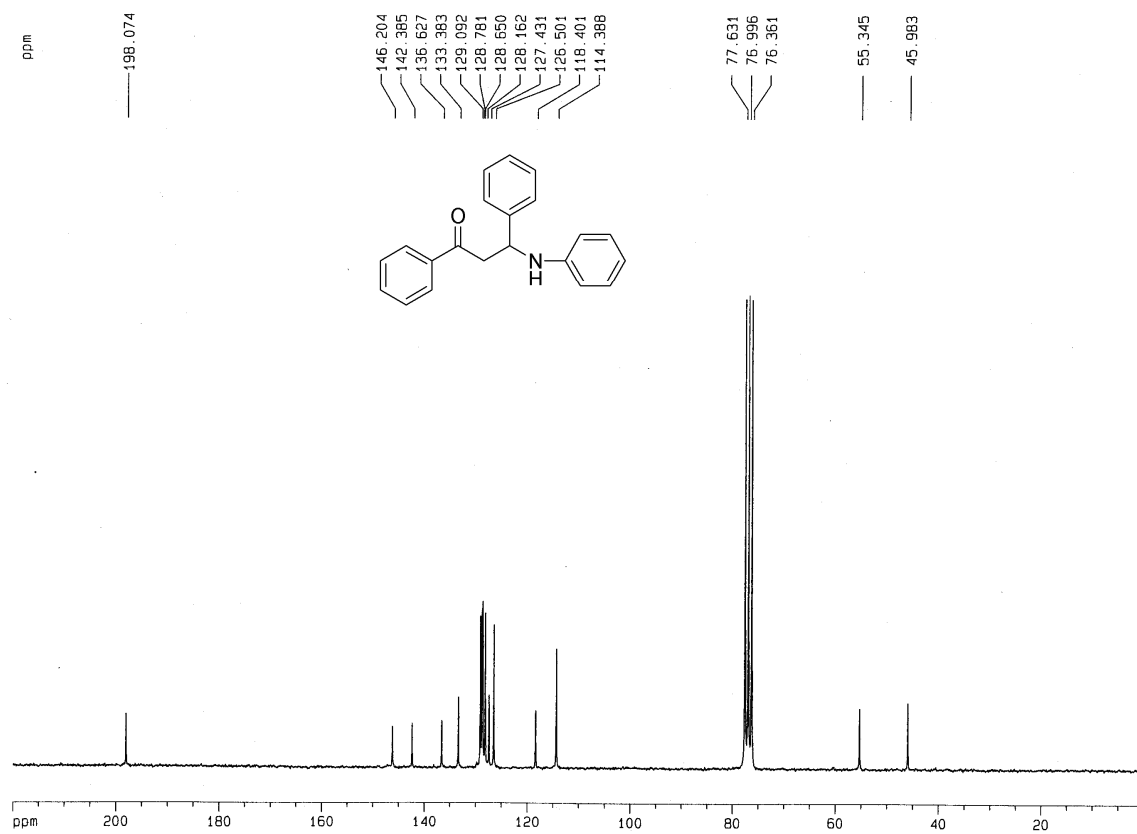

# <sup>1</sup>H NMR of 4b

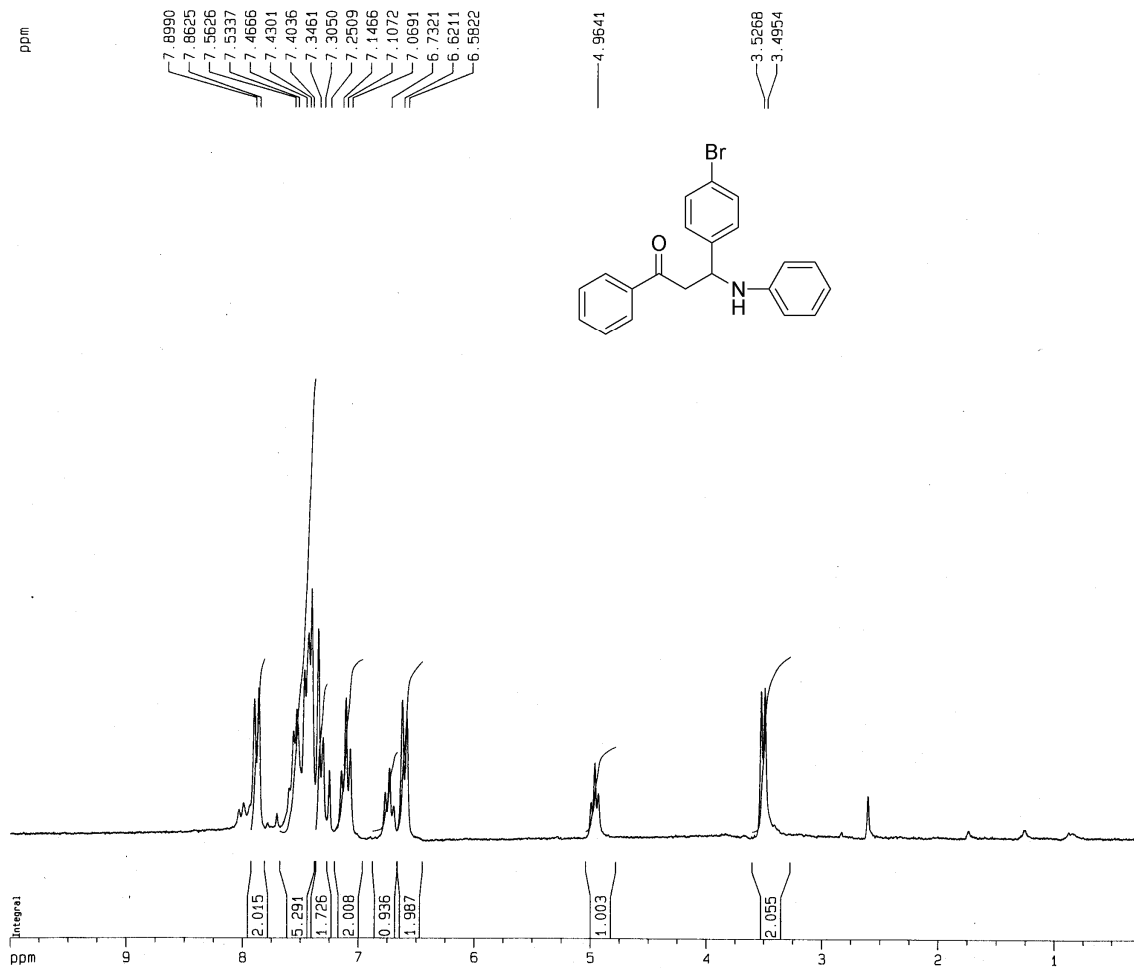

### <sup>13</sup>C NMR of 4b

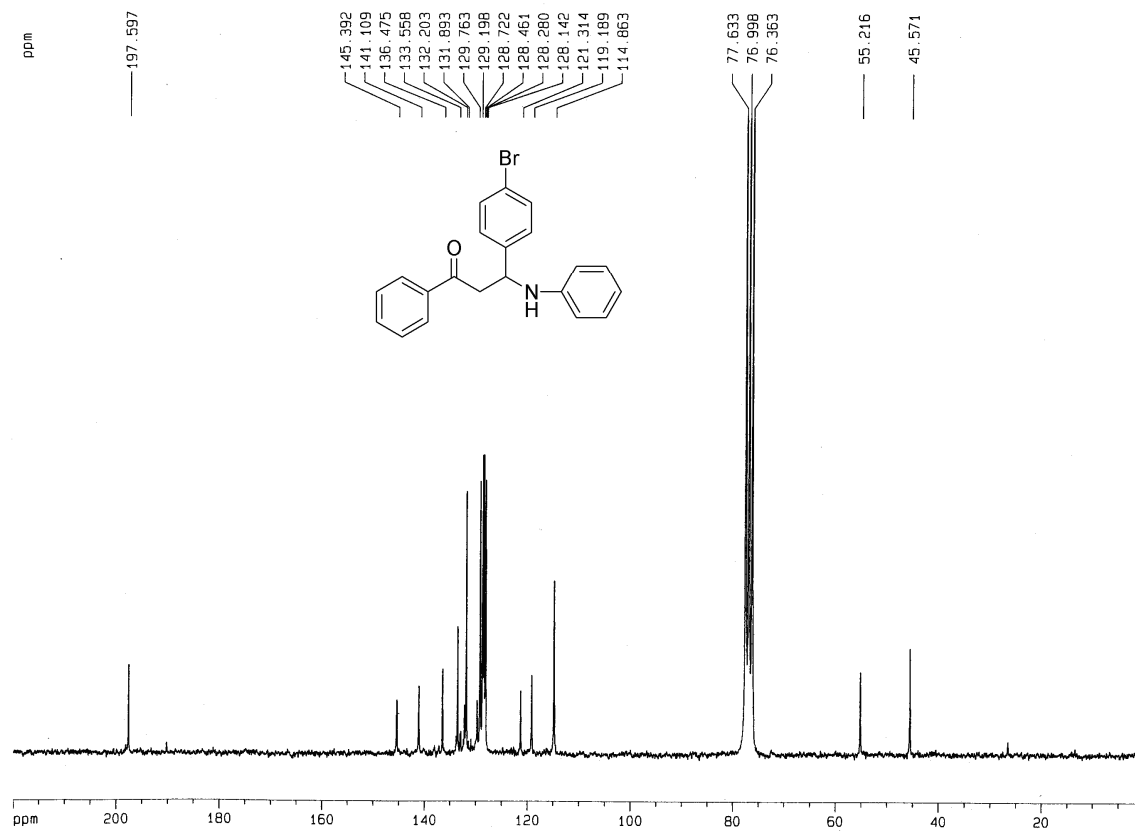

# <sup>1</sup>H NMR of 4c

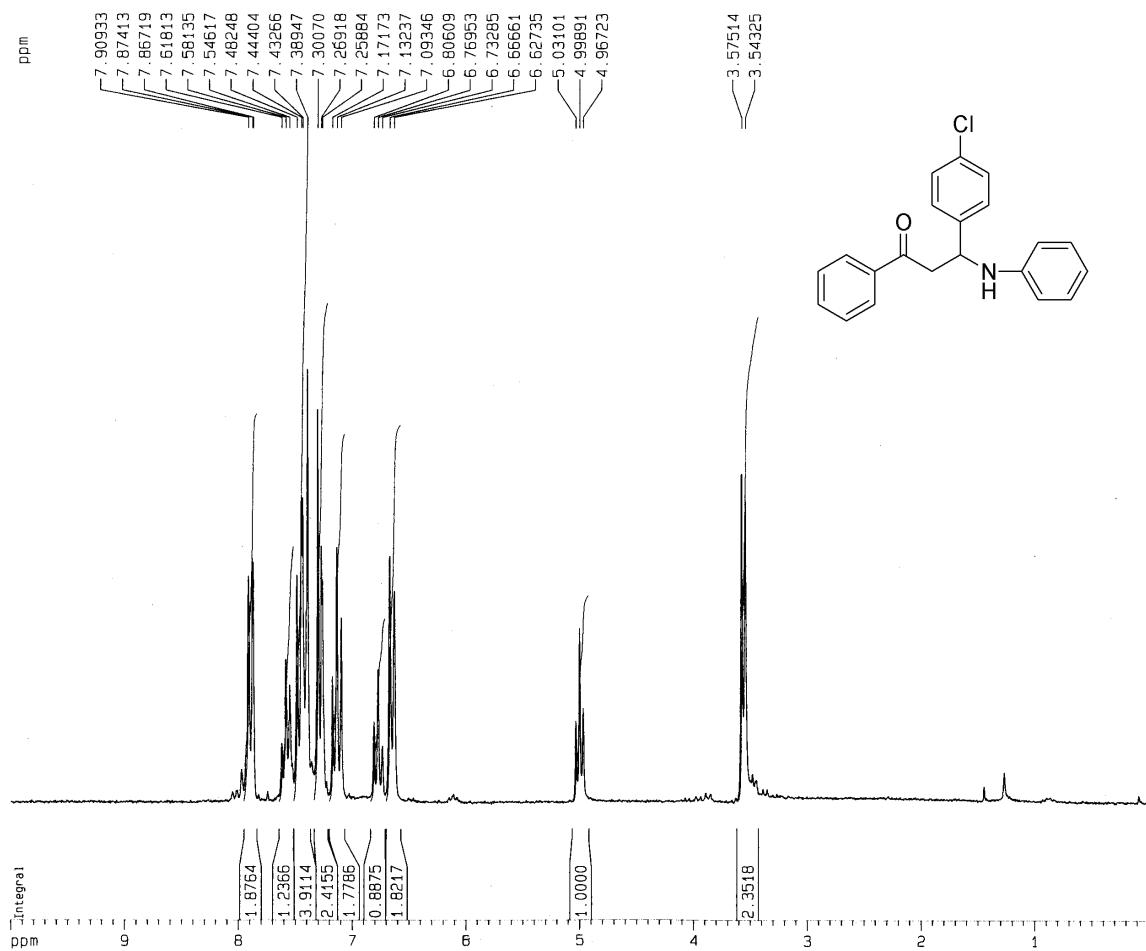

### <sup>13</sup>C NMR of 4c

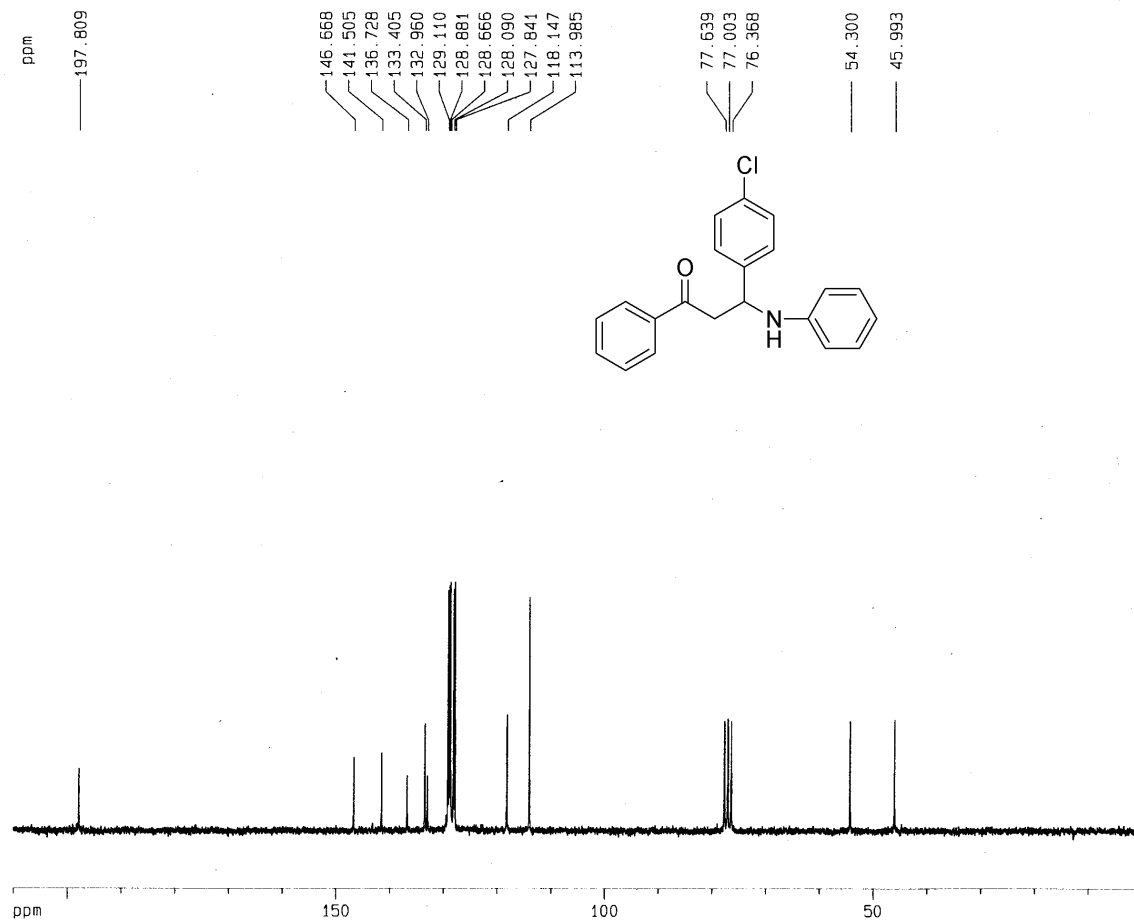



# <sup>1</sup>H NMR of 4d

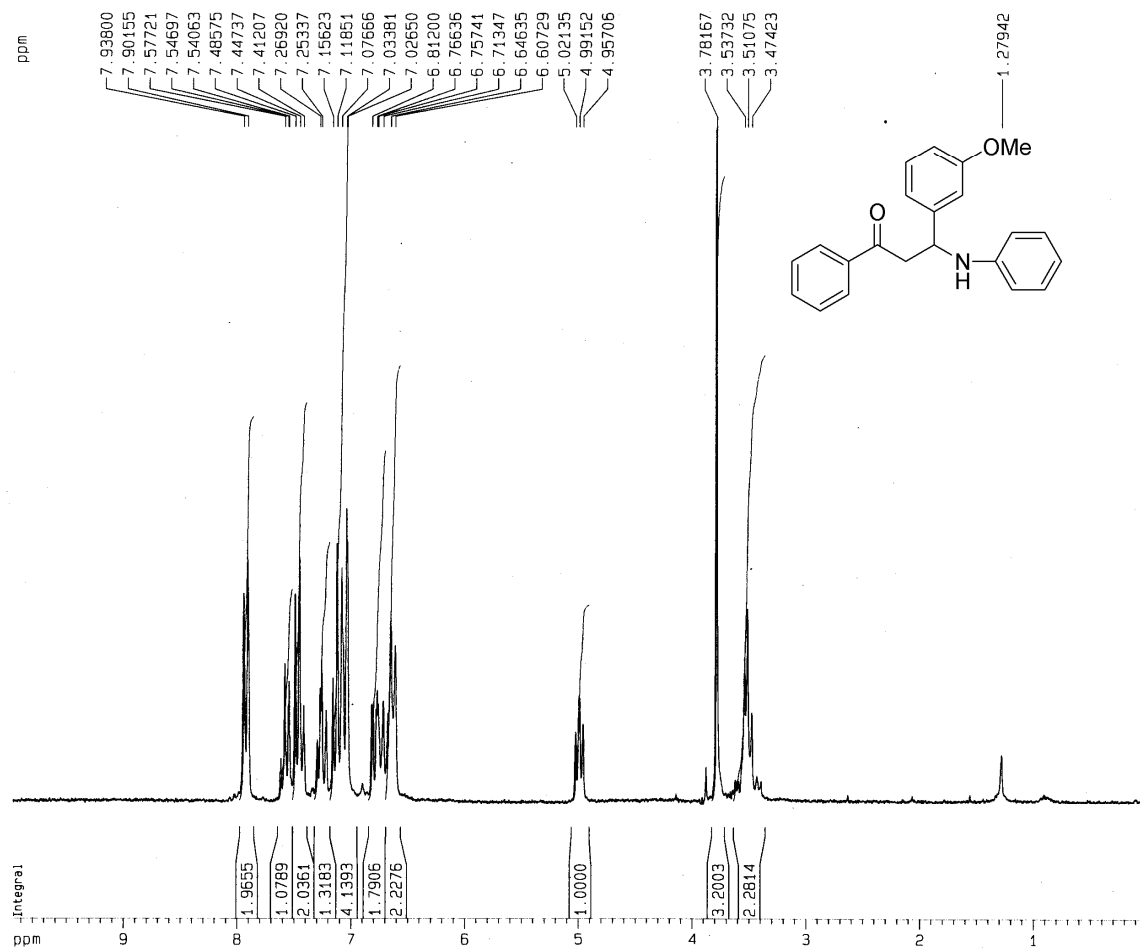

### <sup>13</sup>C NMR of 4d

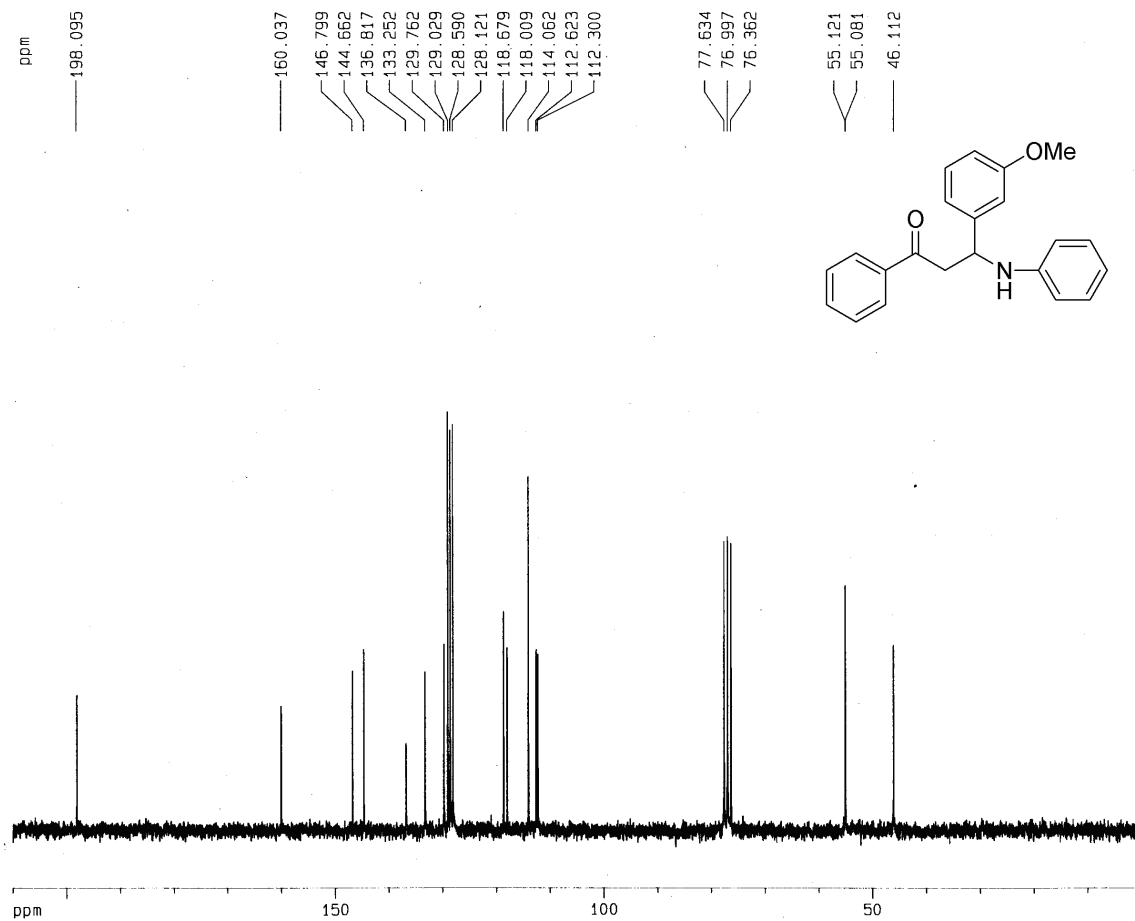

# <sup>1</sup>H NMR of 4e

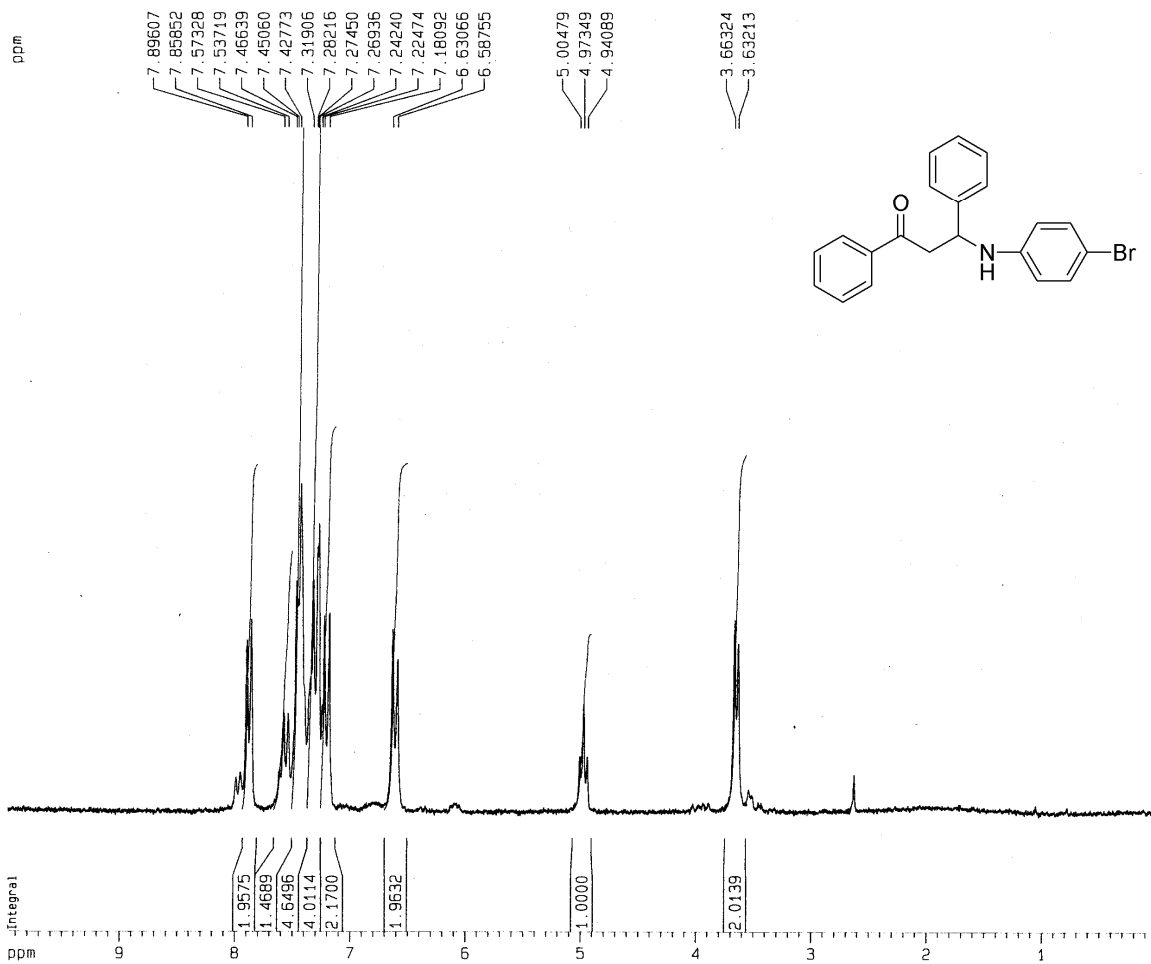

### <sup>13</sup>C NMR of 4e

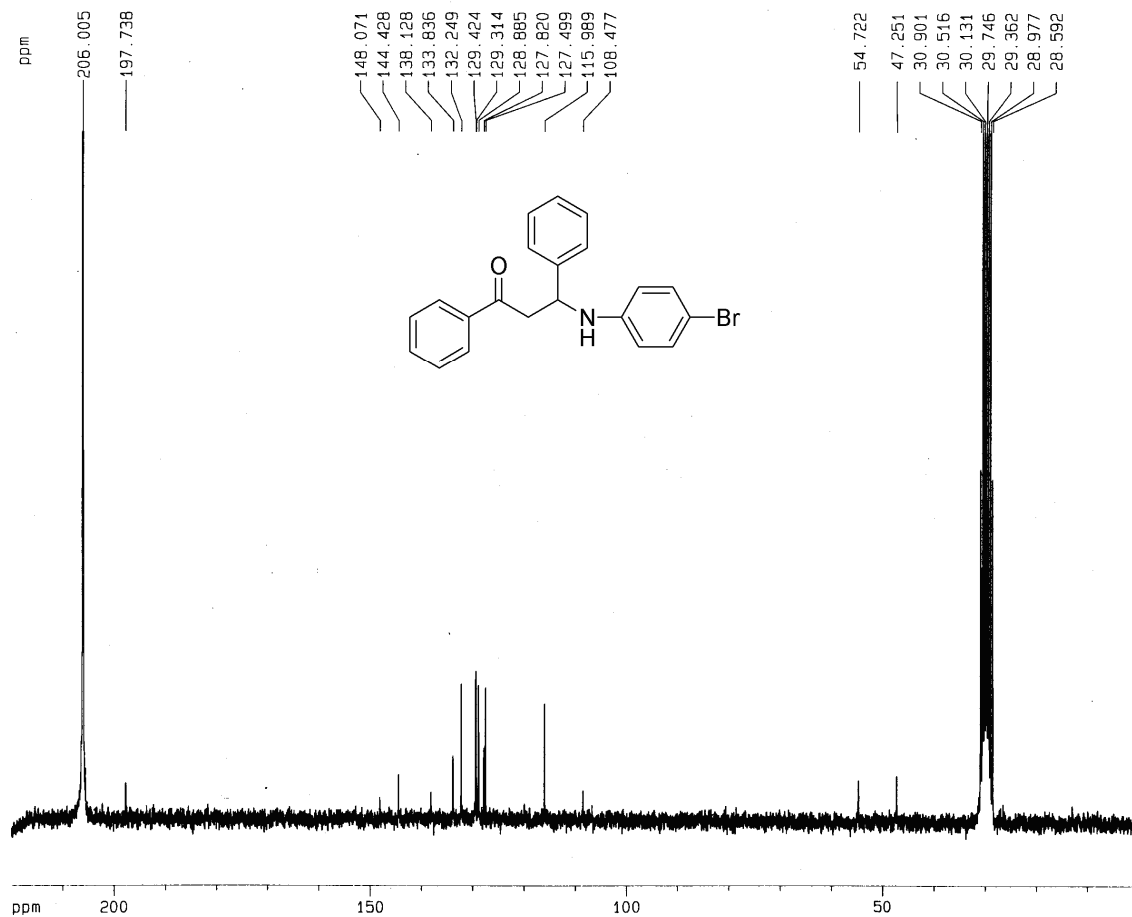

# <sup>1</sup>H NMR of 4f

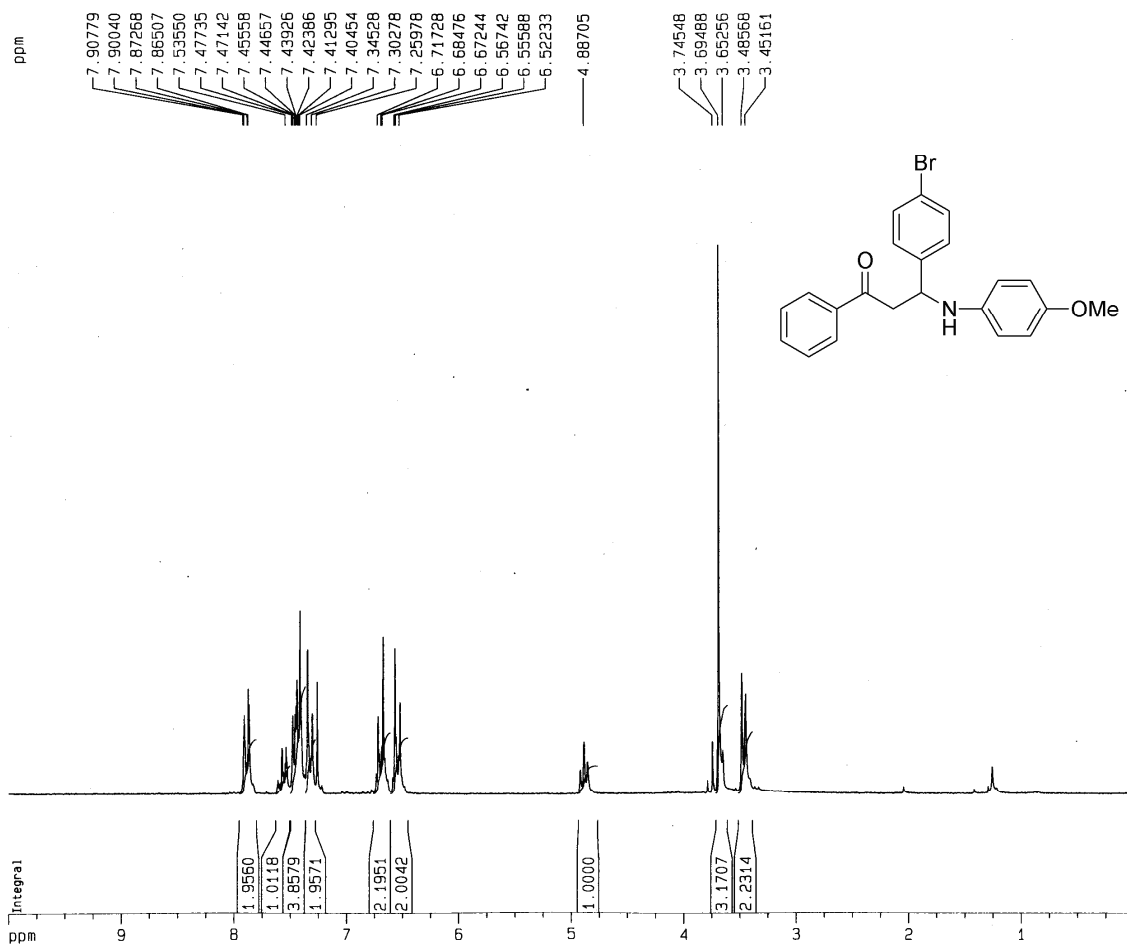

### <sup>13</sup>C NMR of 4f

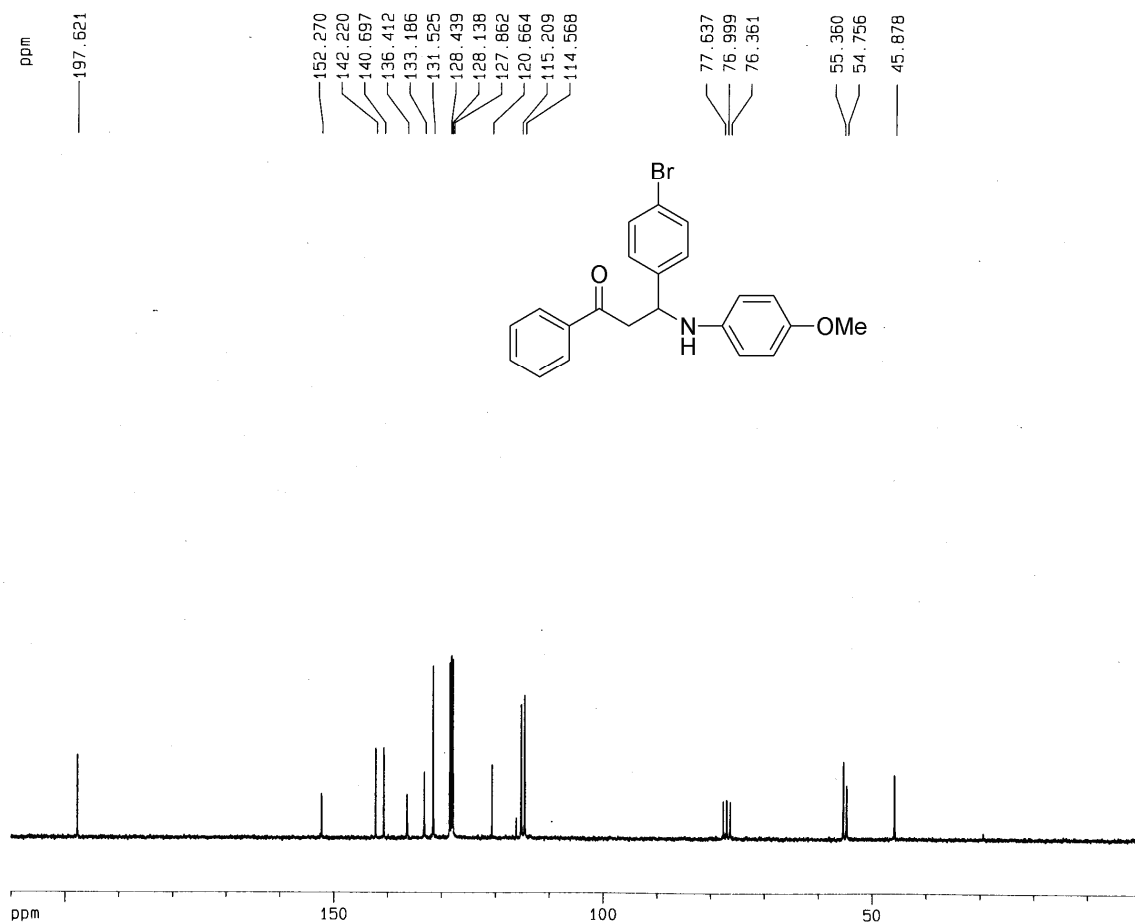

# <sup>1</sup>H NMR of 4g

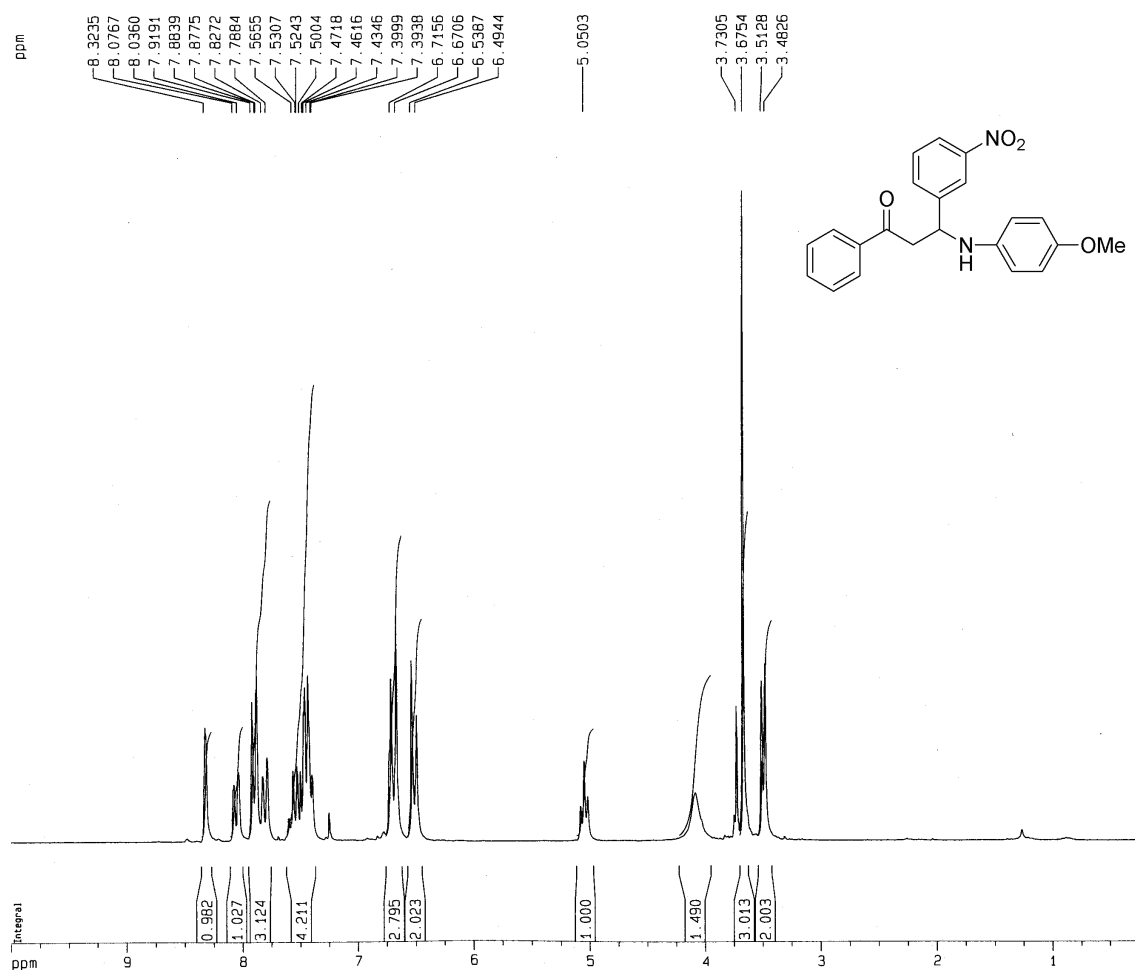

### <sup>13</sup>C NMR of 4g

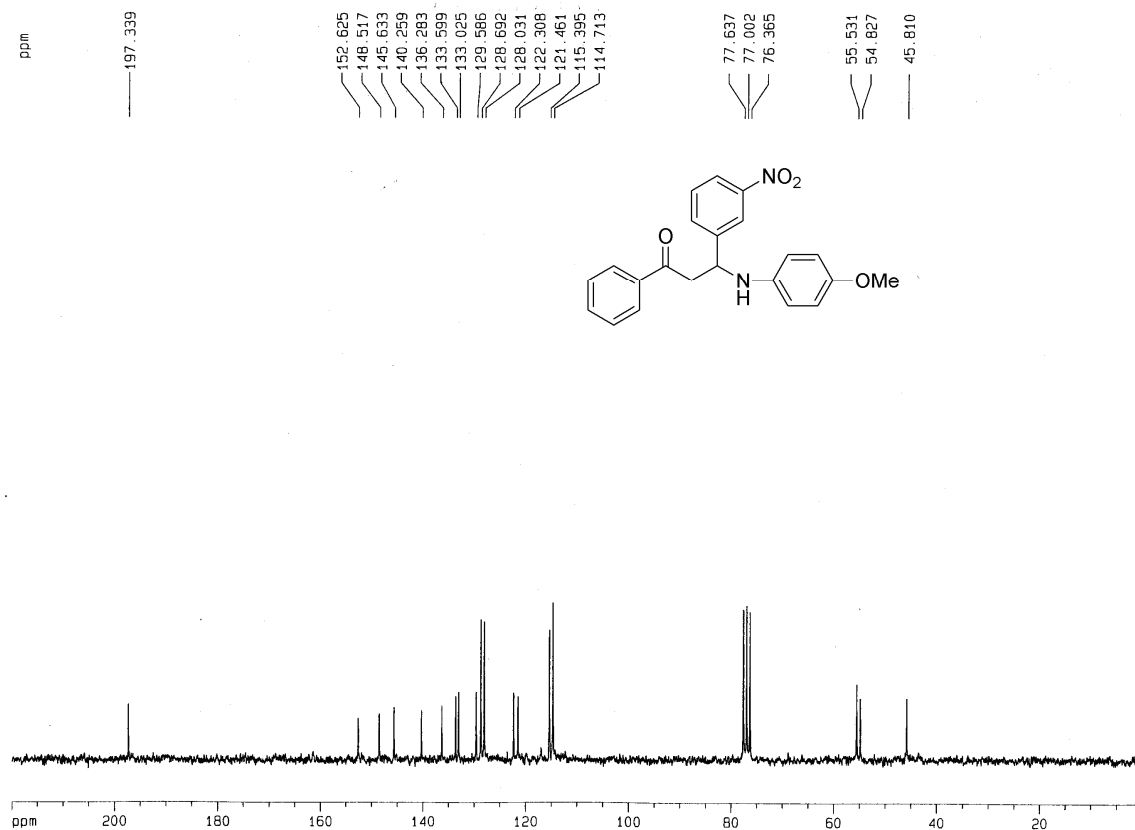



# <sup>1</sup>H NMR of 4h

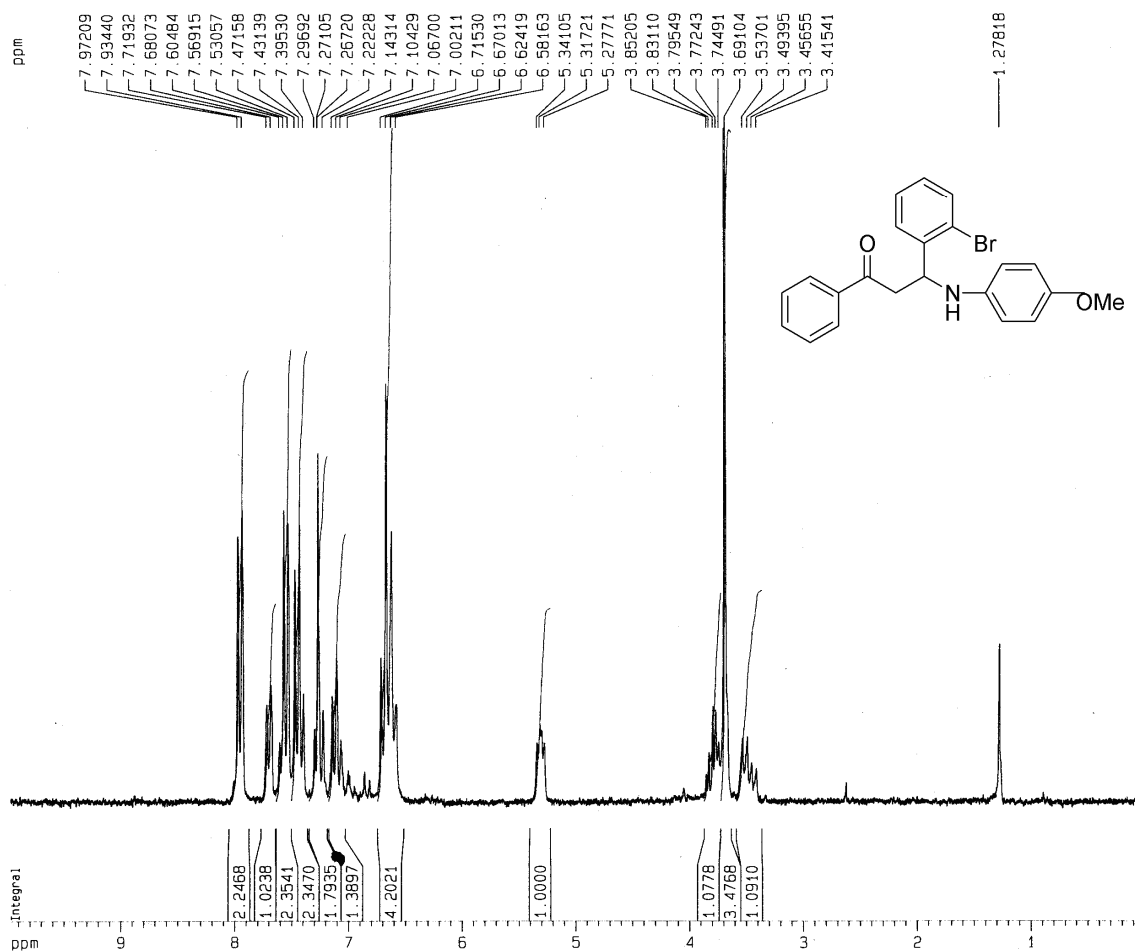

### <sup>13</sup>C NMR of 4h

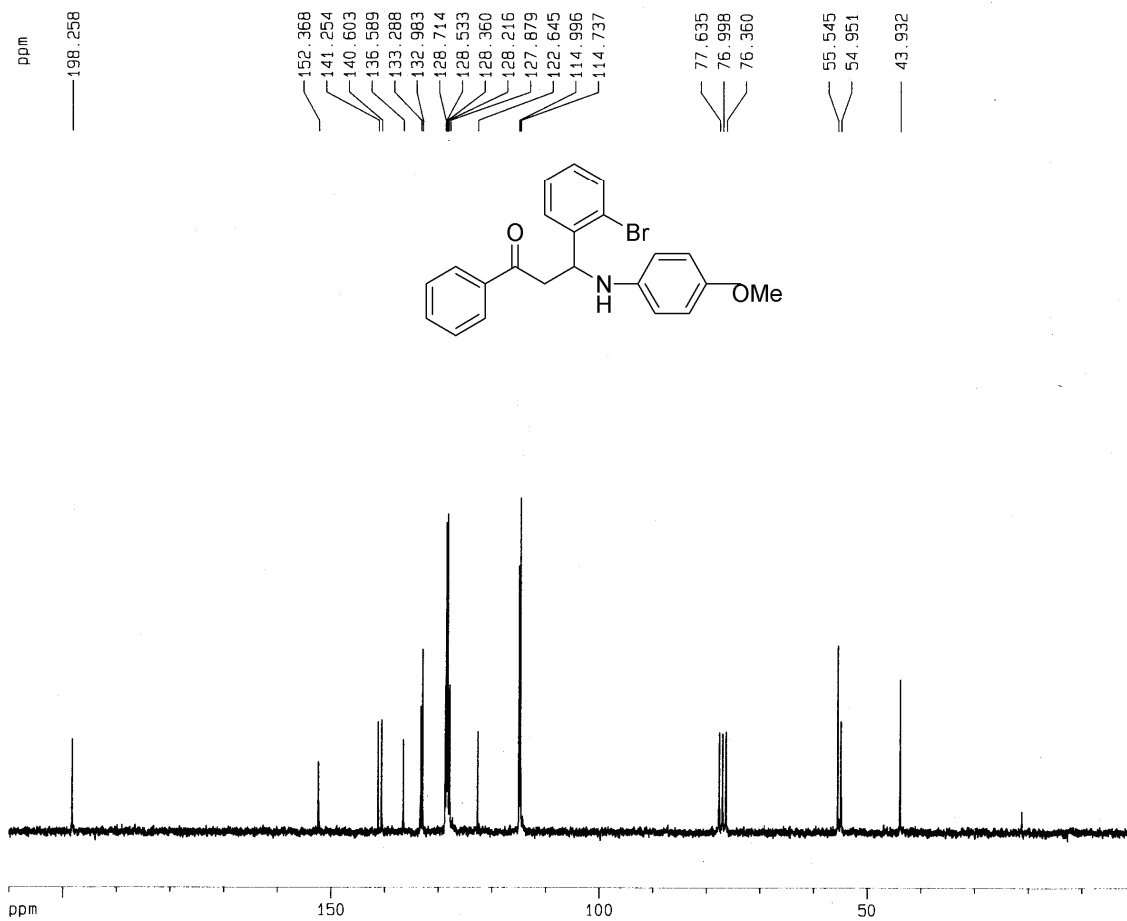

# <sup>1</sup>H NMR of 4i

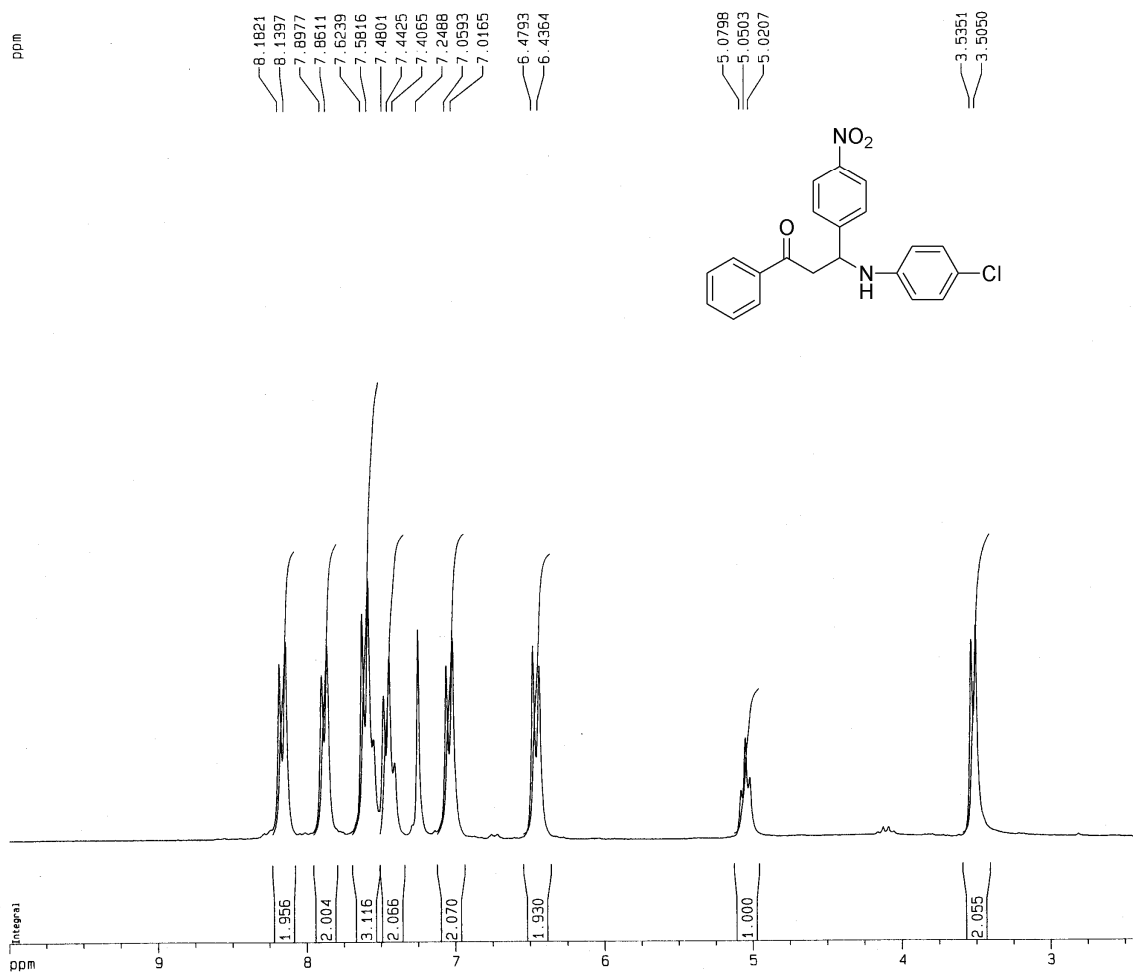

### <sup>13</sup>C NMR of 4i

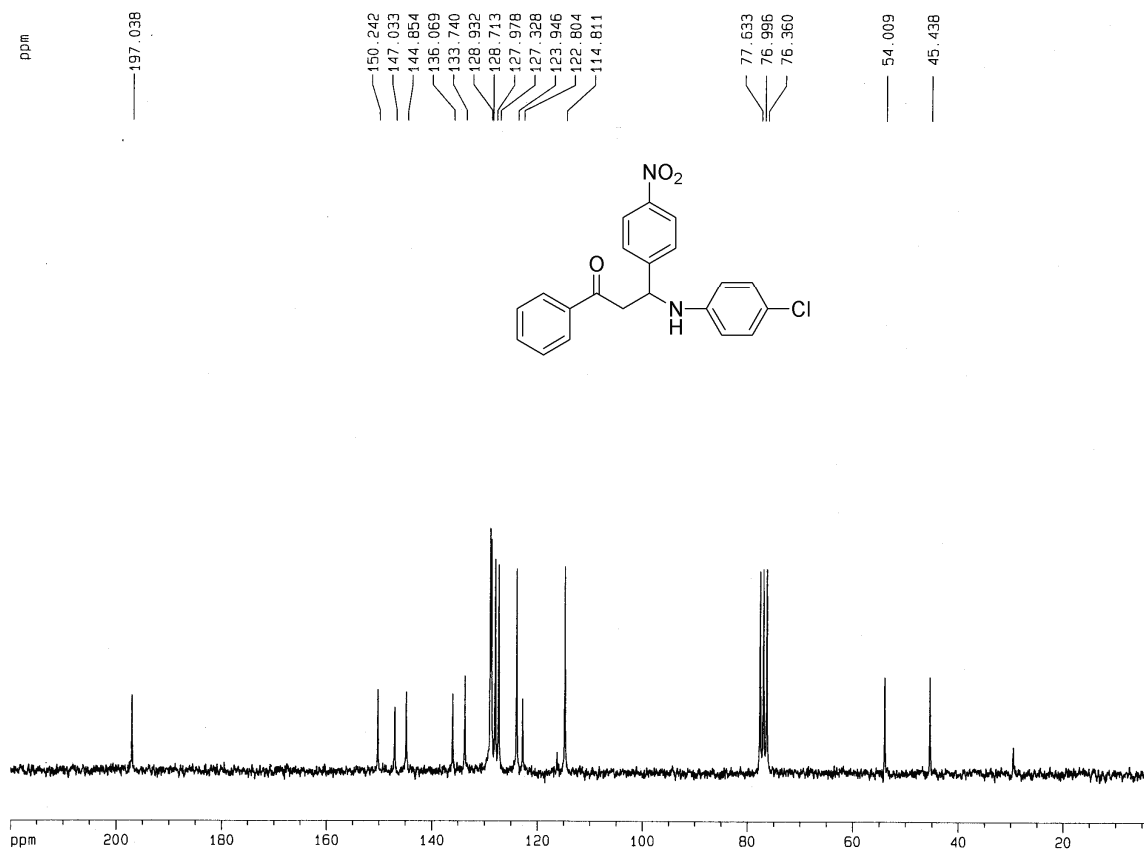

# <sup>1</sup>H NMR of 4j

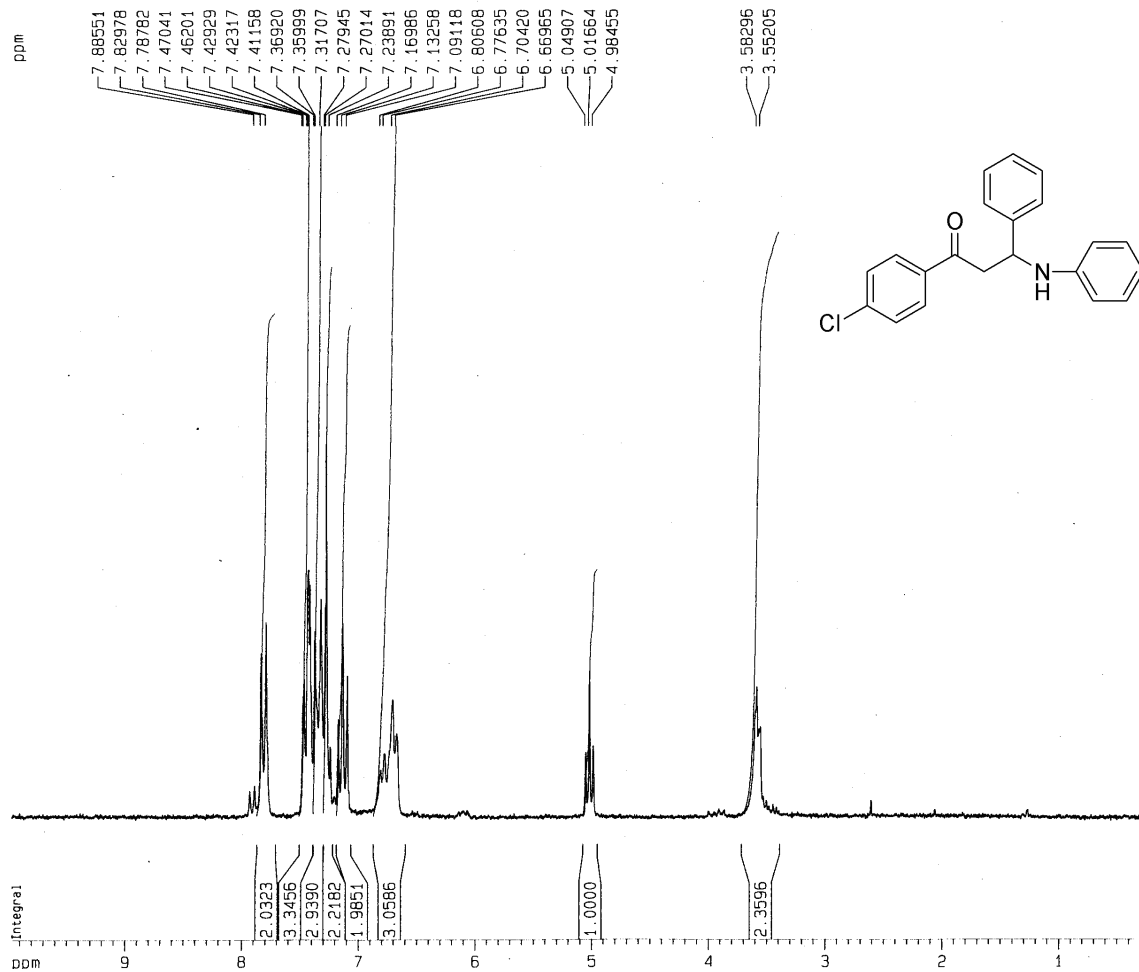

### <sup>13</sup>C NMR of 4j

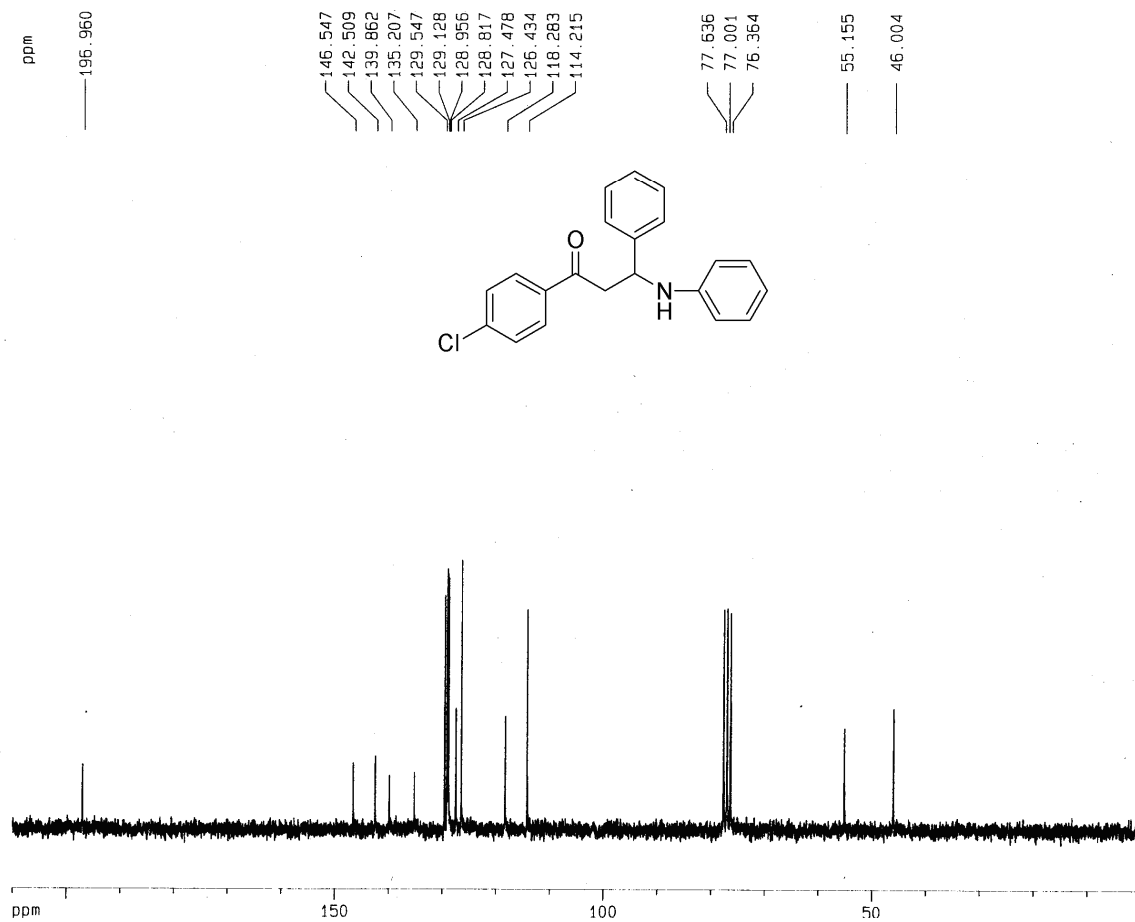

# <sup>1</sup>H NMR of 4k

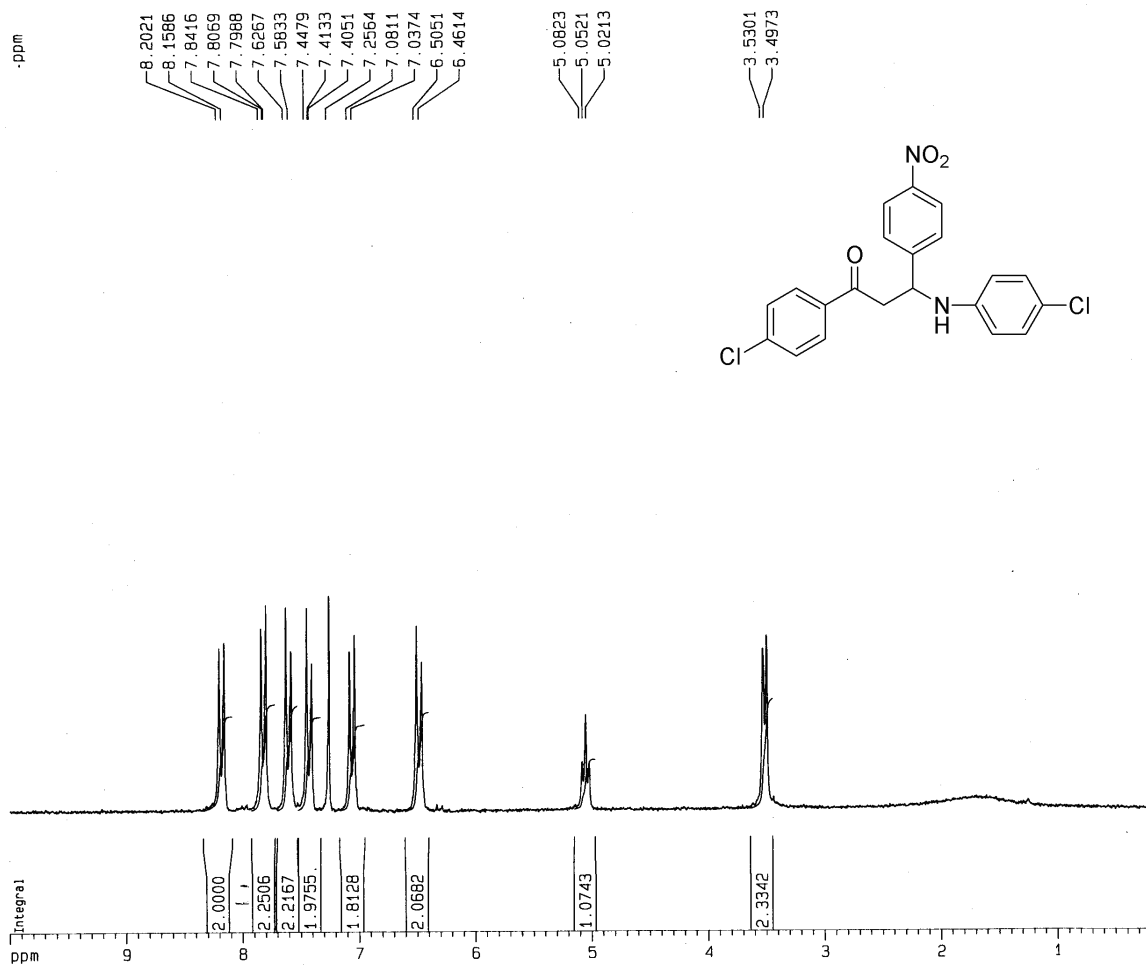

### <sup>13</sup>C NMR of 4k

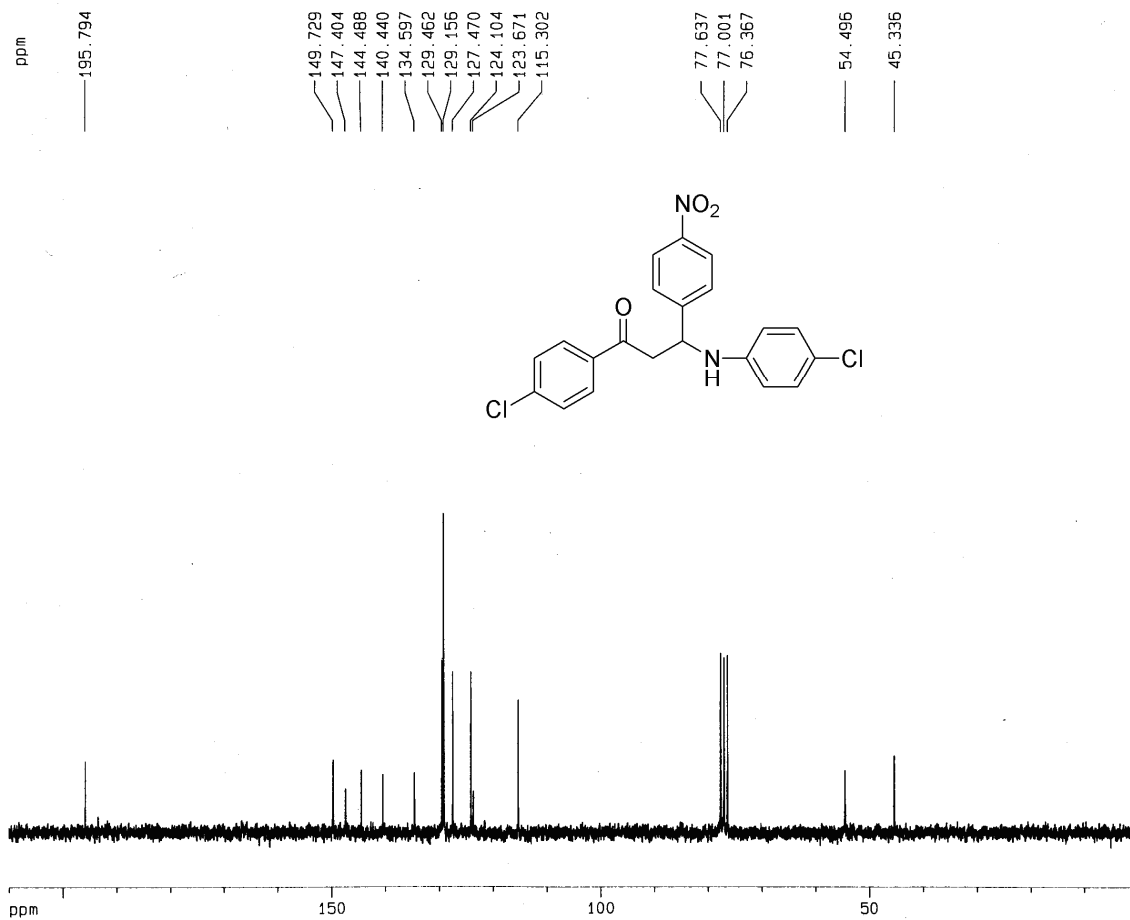



# <sup>1</sup>H NMR of 4l

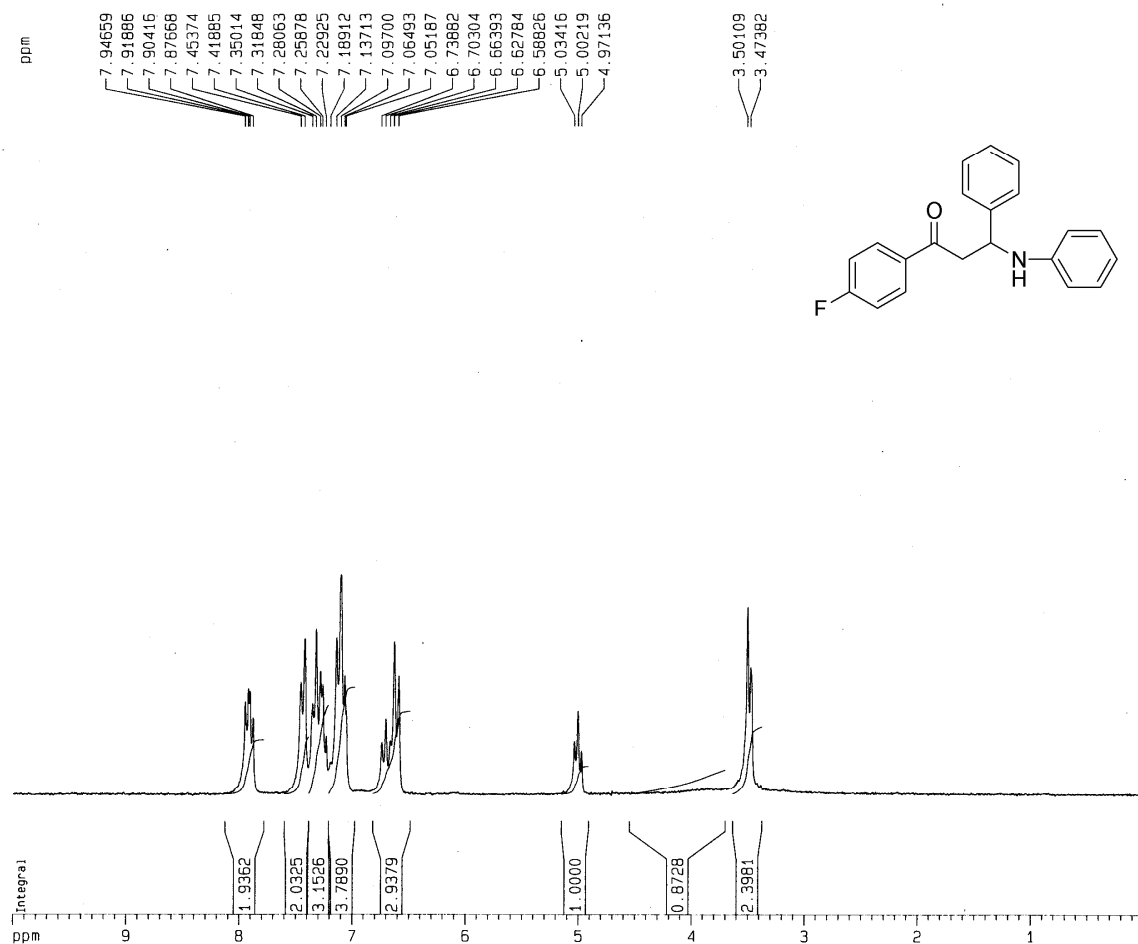

### <sup>13</sup>C NMR of 4l

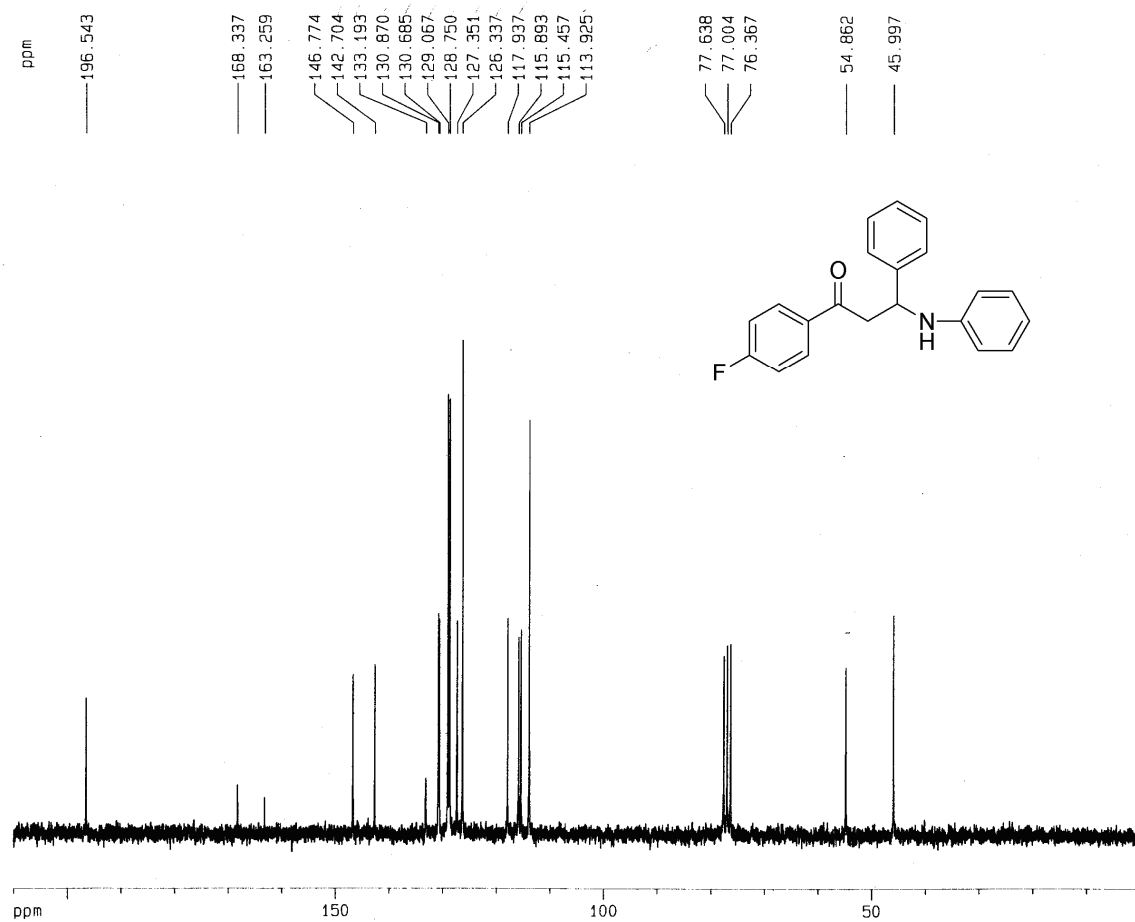

# <sup>1</sup>H NMR of 4m

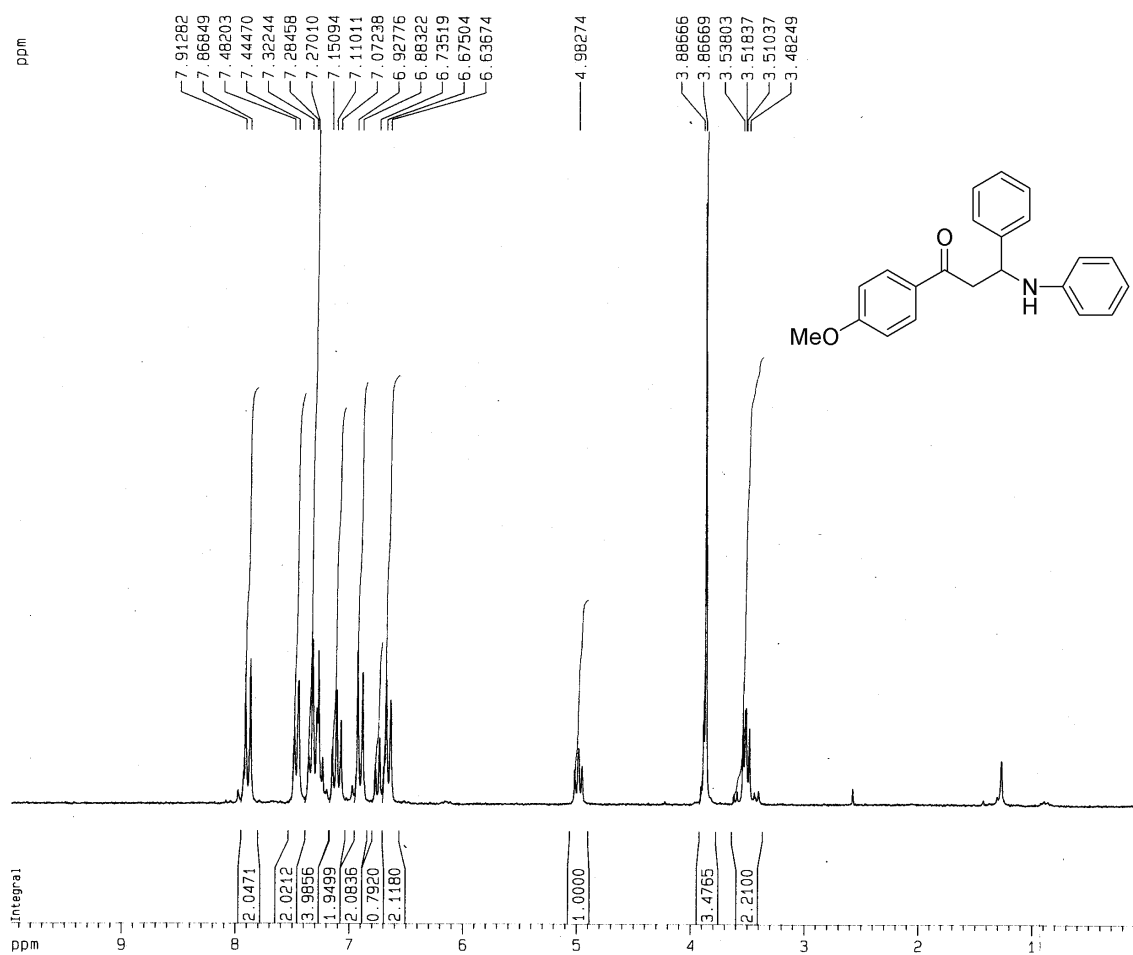

### <sup>13</sup>C NMR of 4m

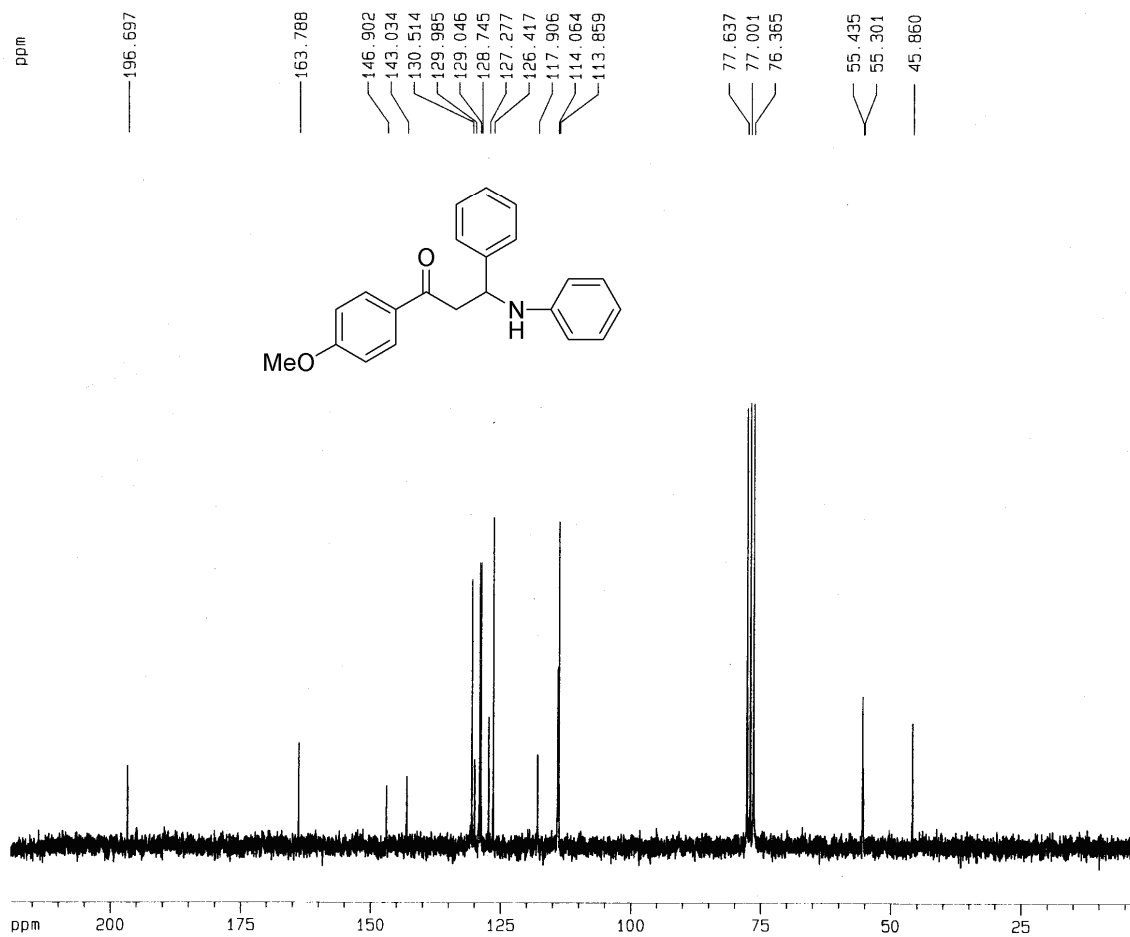

# <sup>1</sup>H NMR of 4n

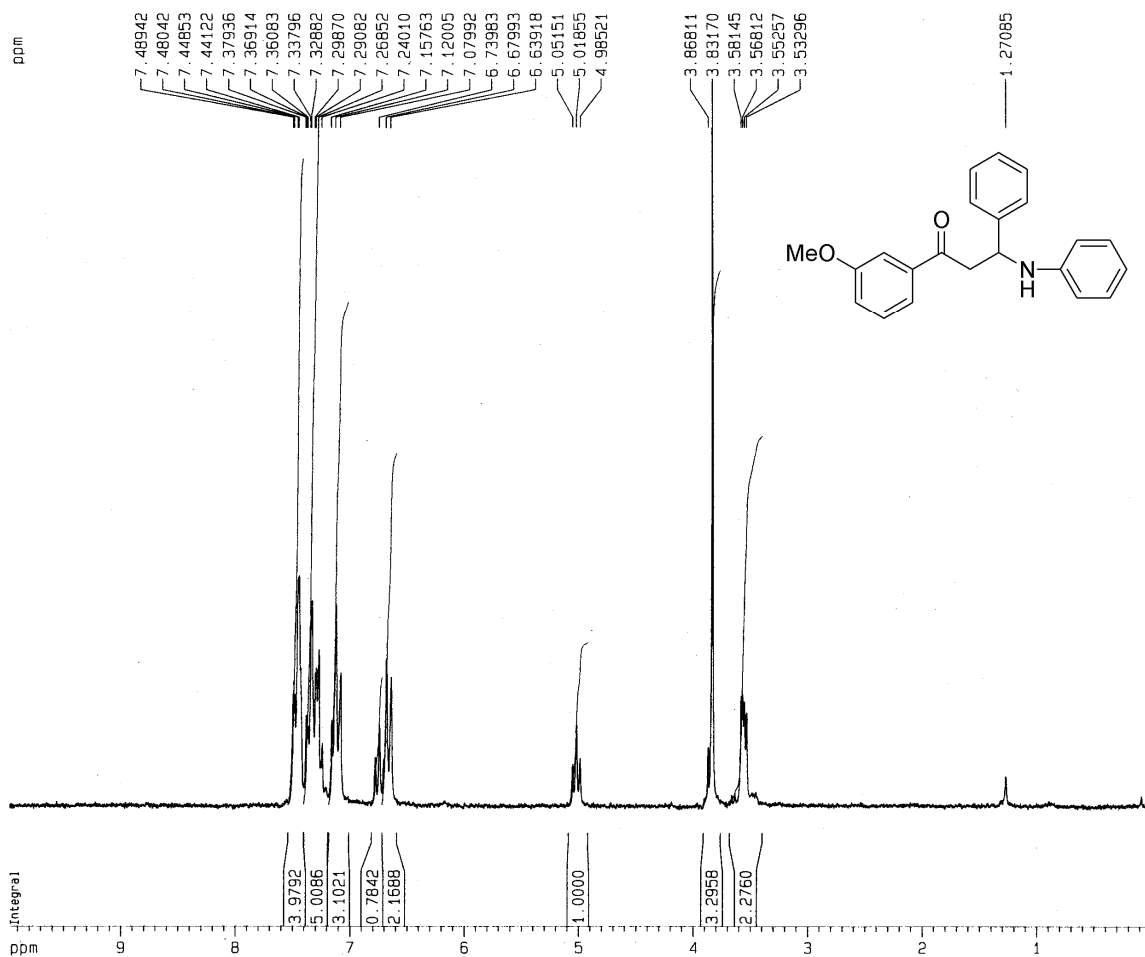

### <sup>13</sup>C NMR of 4n

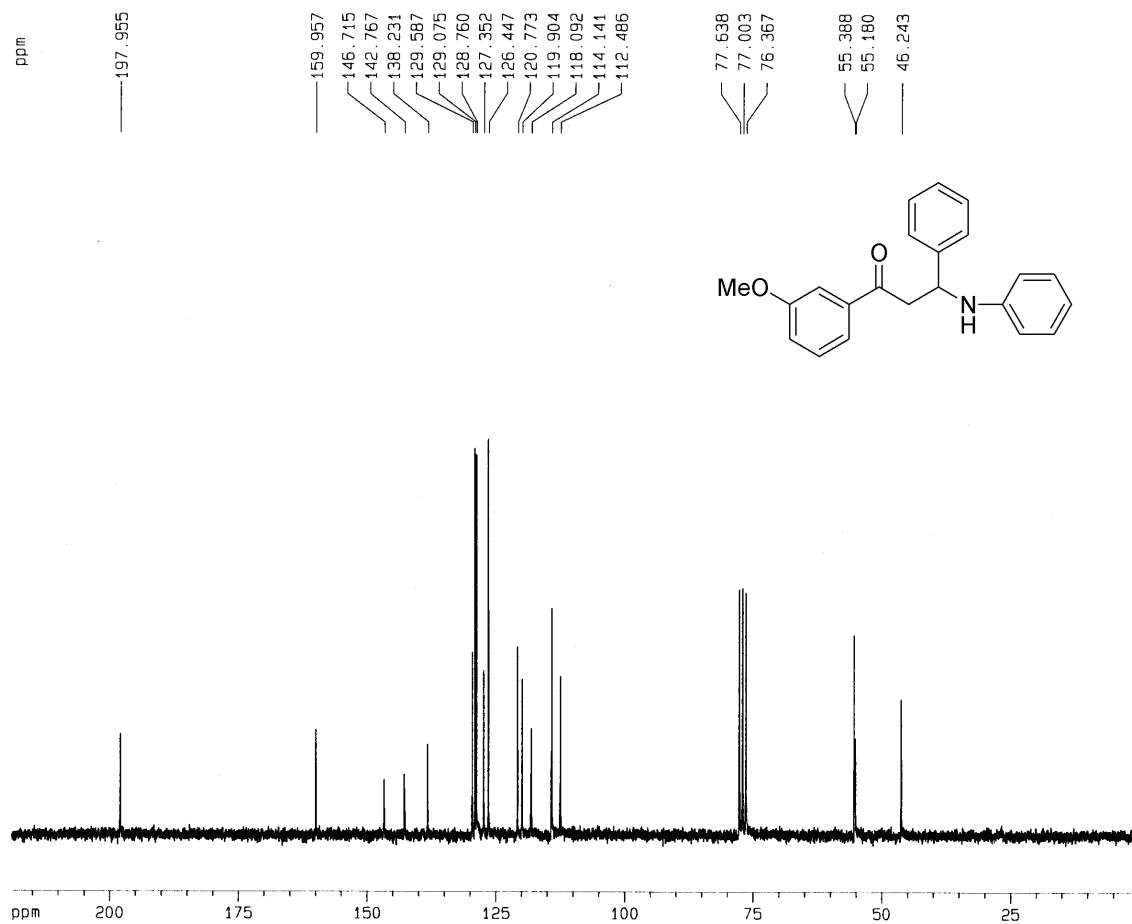

# <sup>1</sup>H NMR of 4o

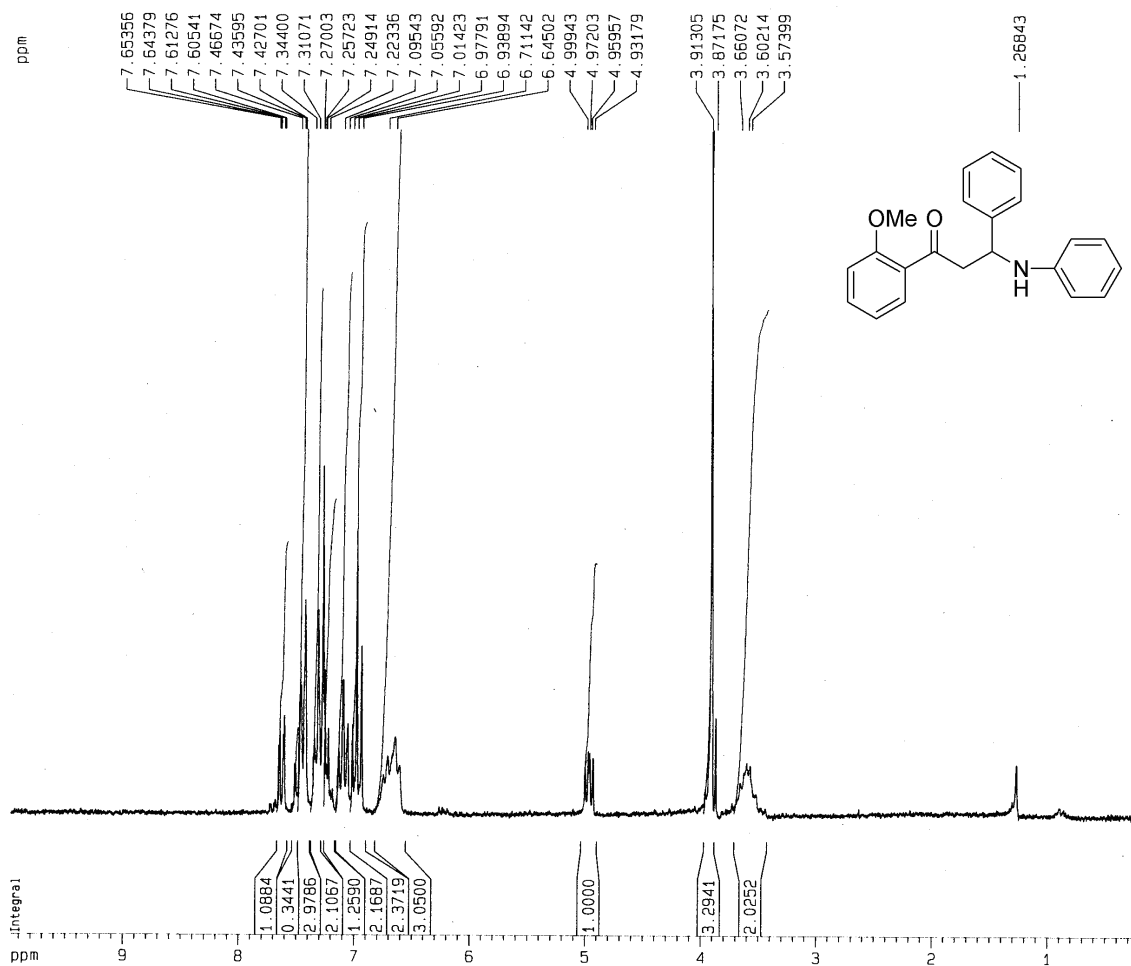

### <sup>13</sup>C NMR of 4o

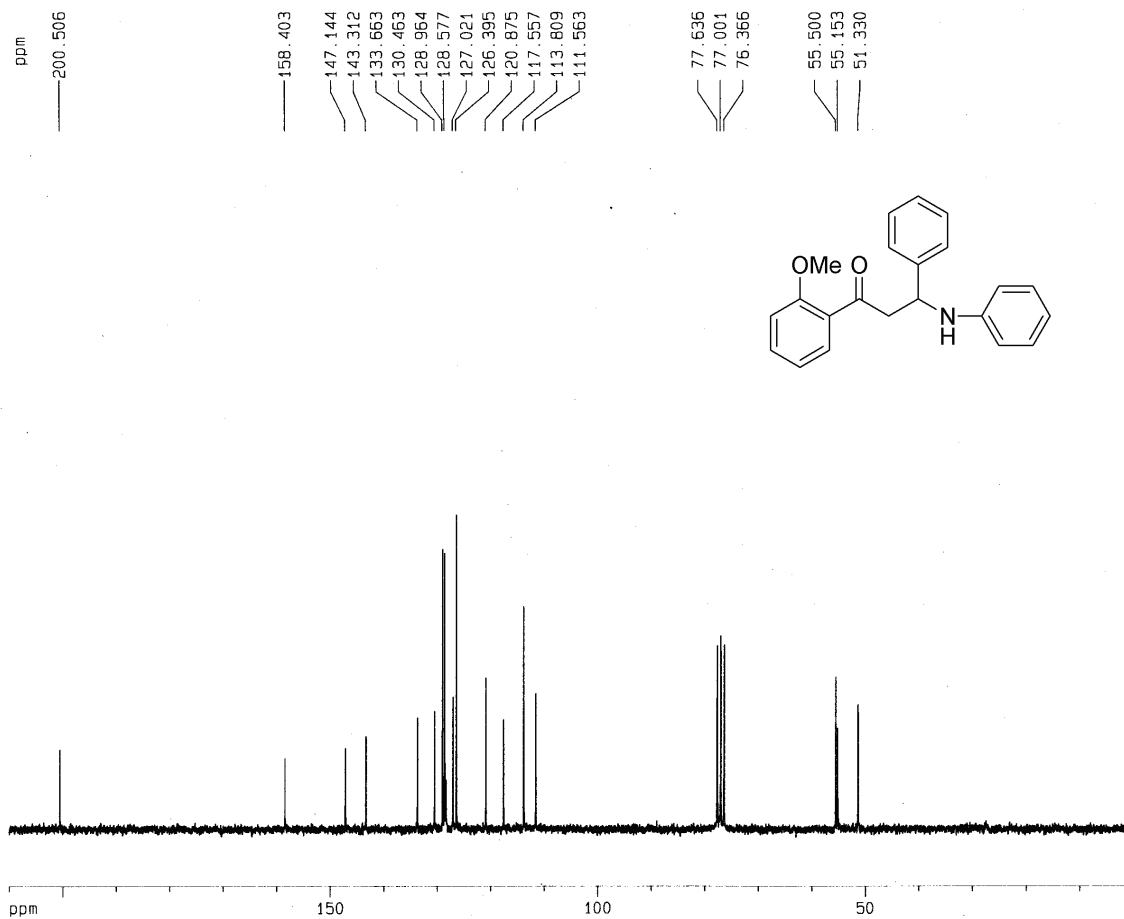



# <sup>1</sup>H NMR of 4p

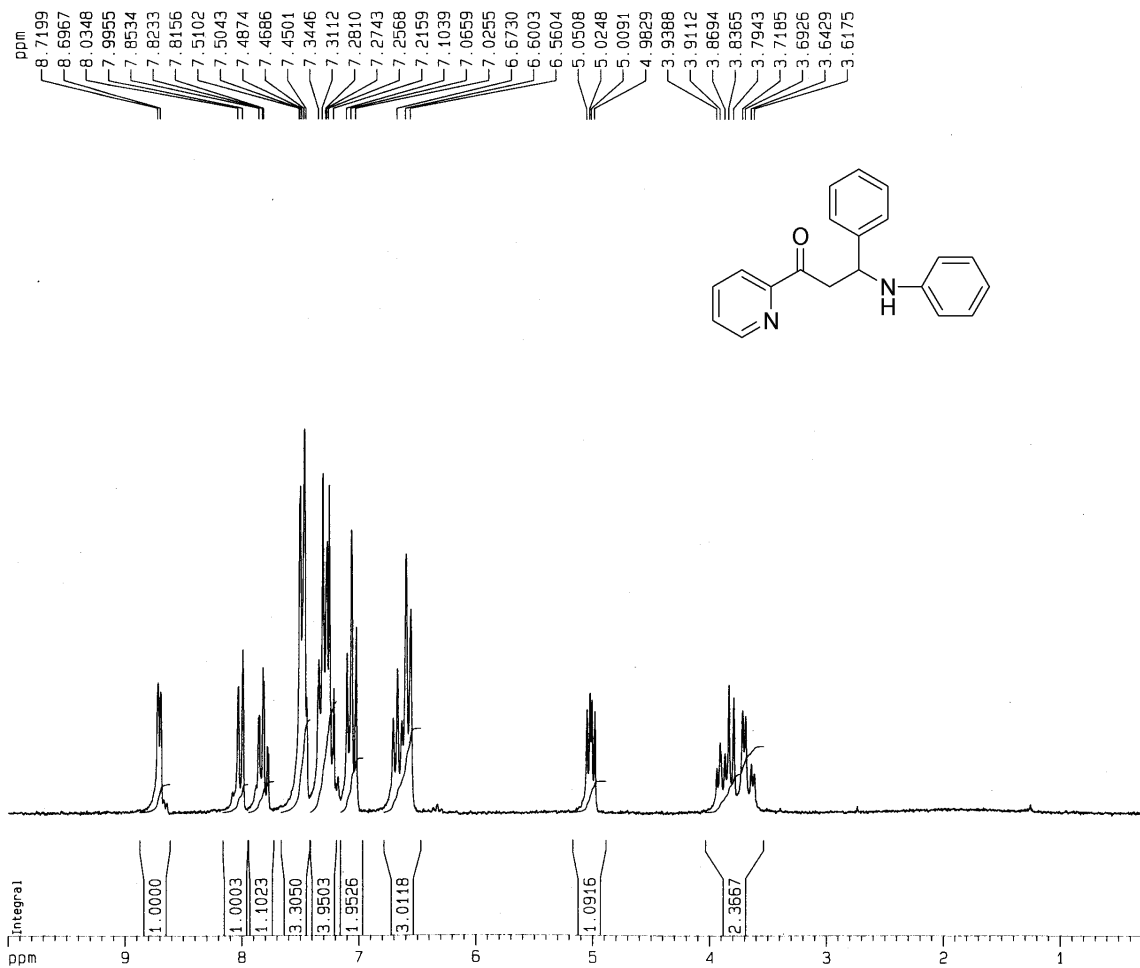

### <sup>13</sup>C NMR of 4p

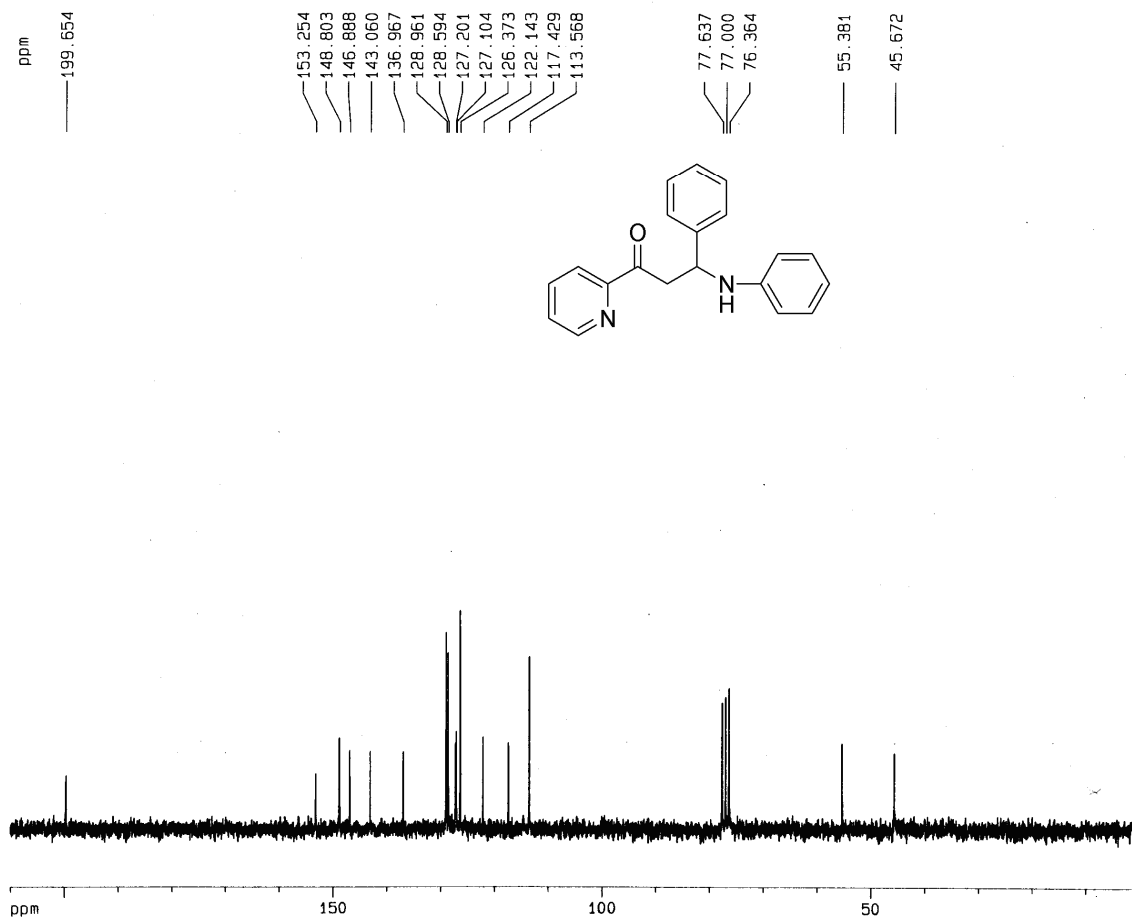

# <sup>1</sup>H NMR of 4q

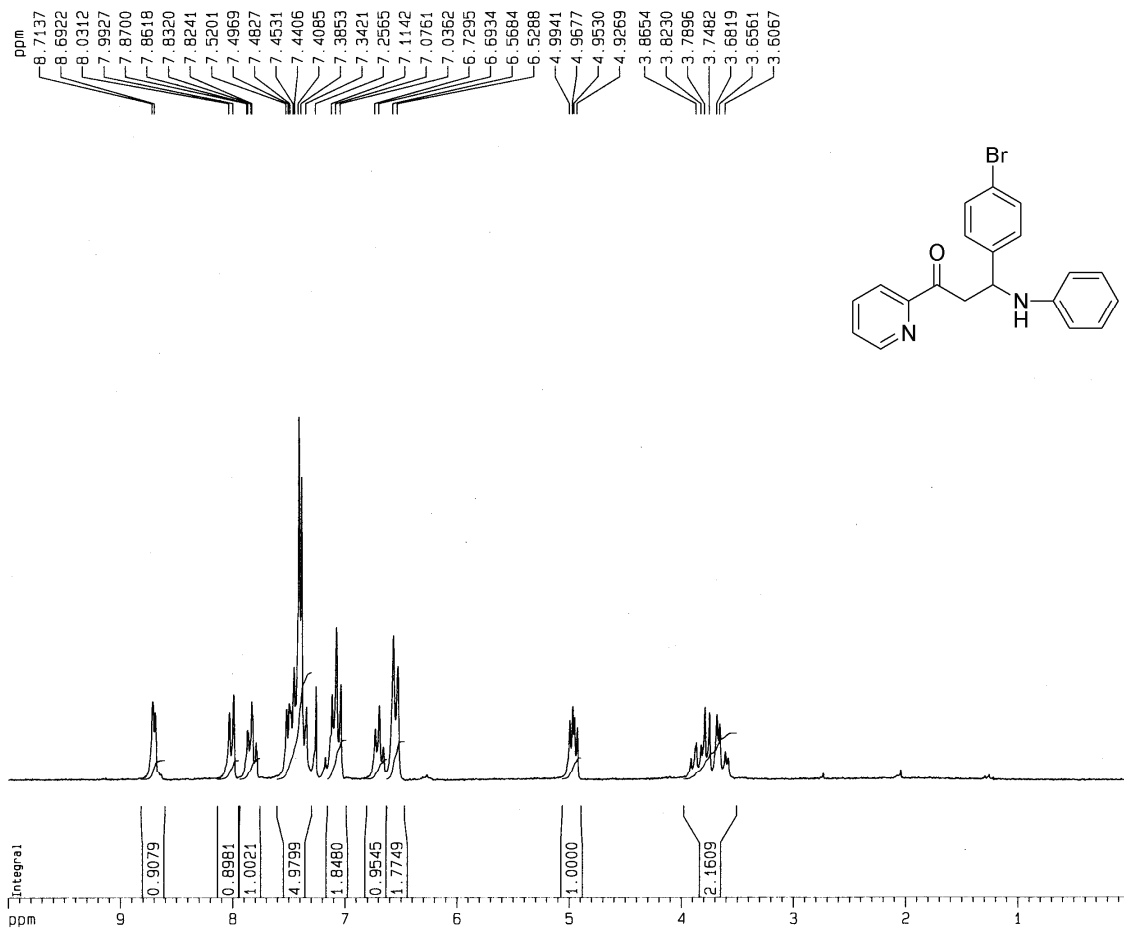

### <sup>13</sup>C NMR of 4q

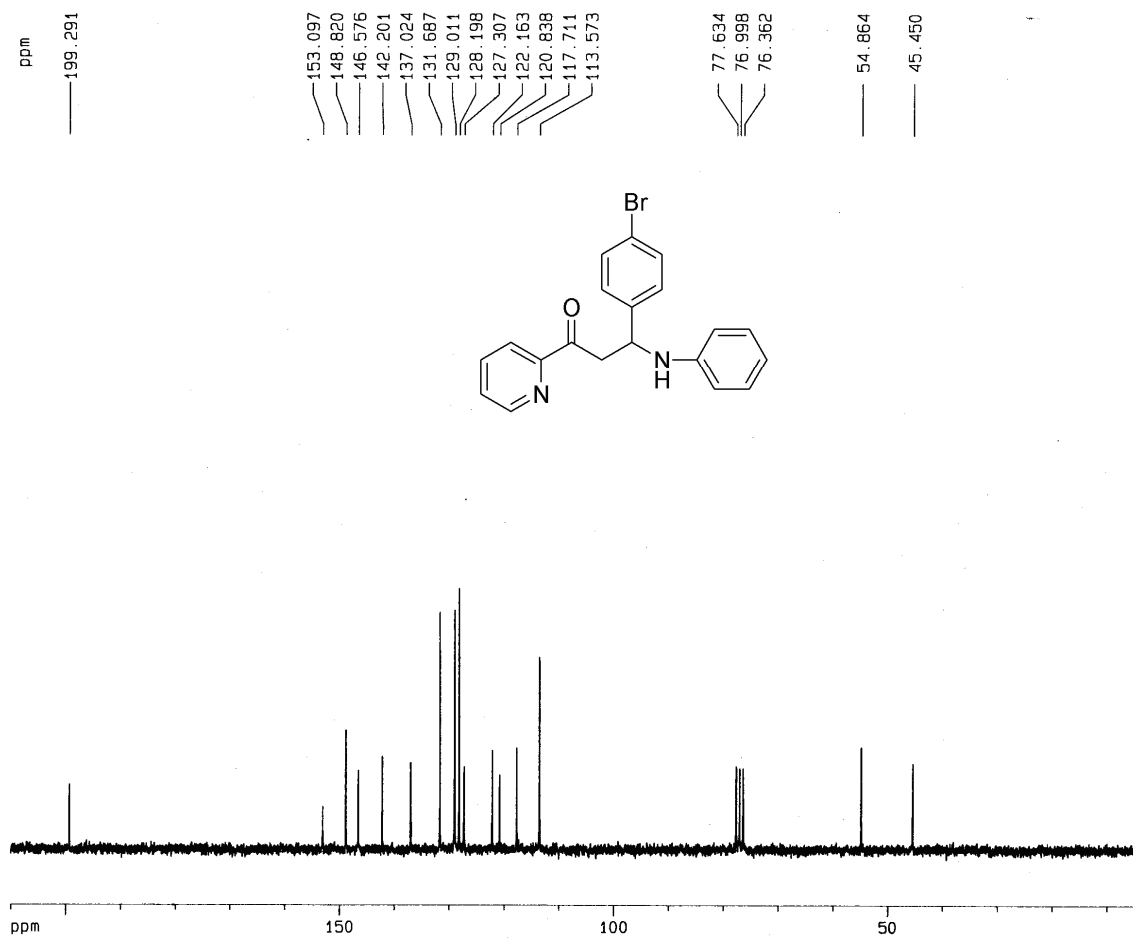

# <sup>1</sup>H NMR of 5a

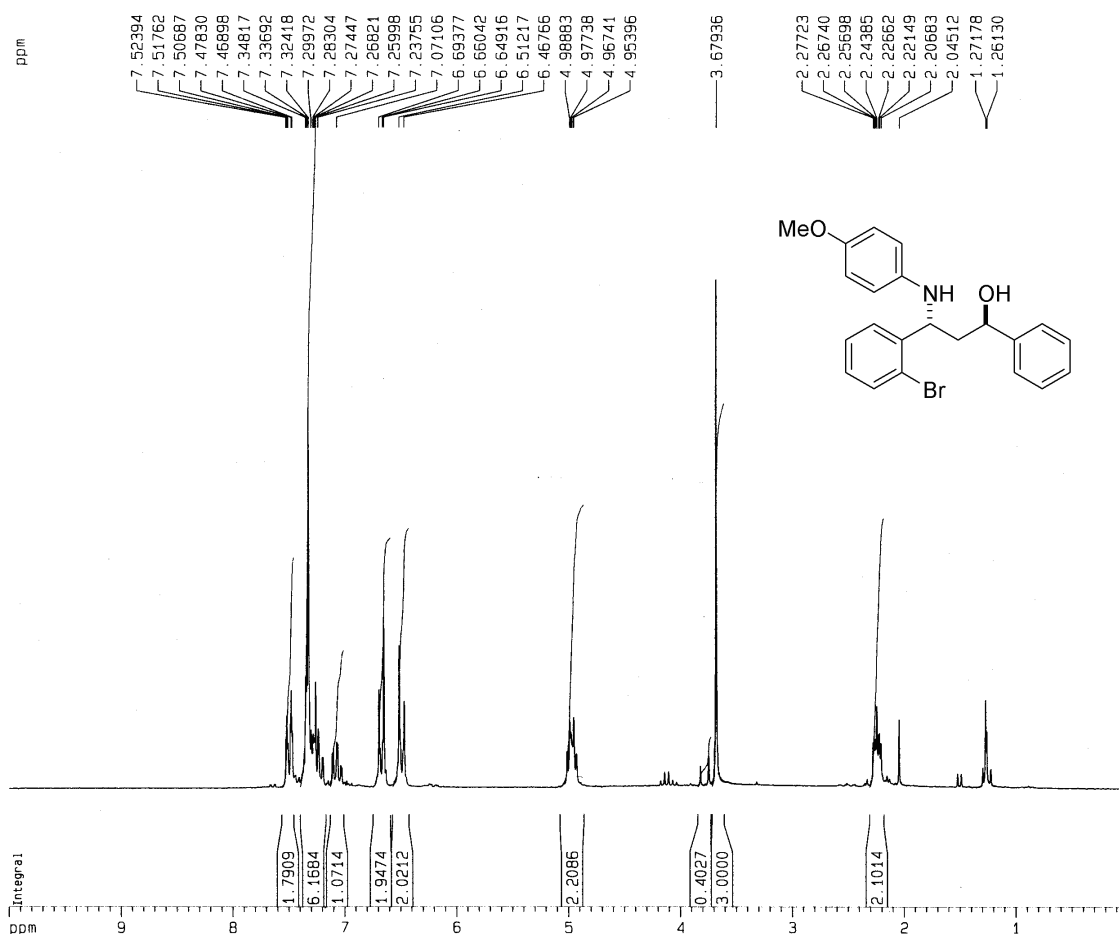

### <sup>13</sup>C NMR of 5a

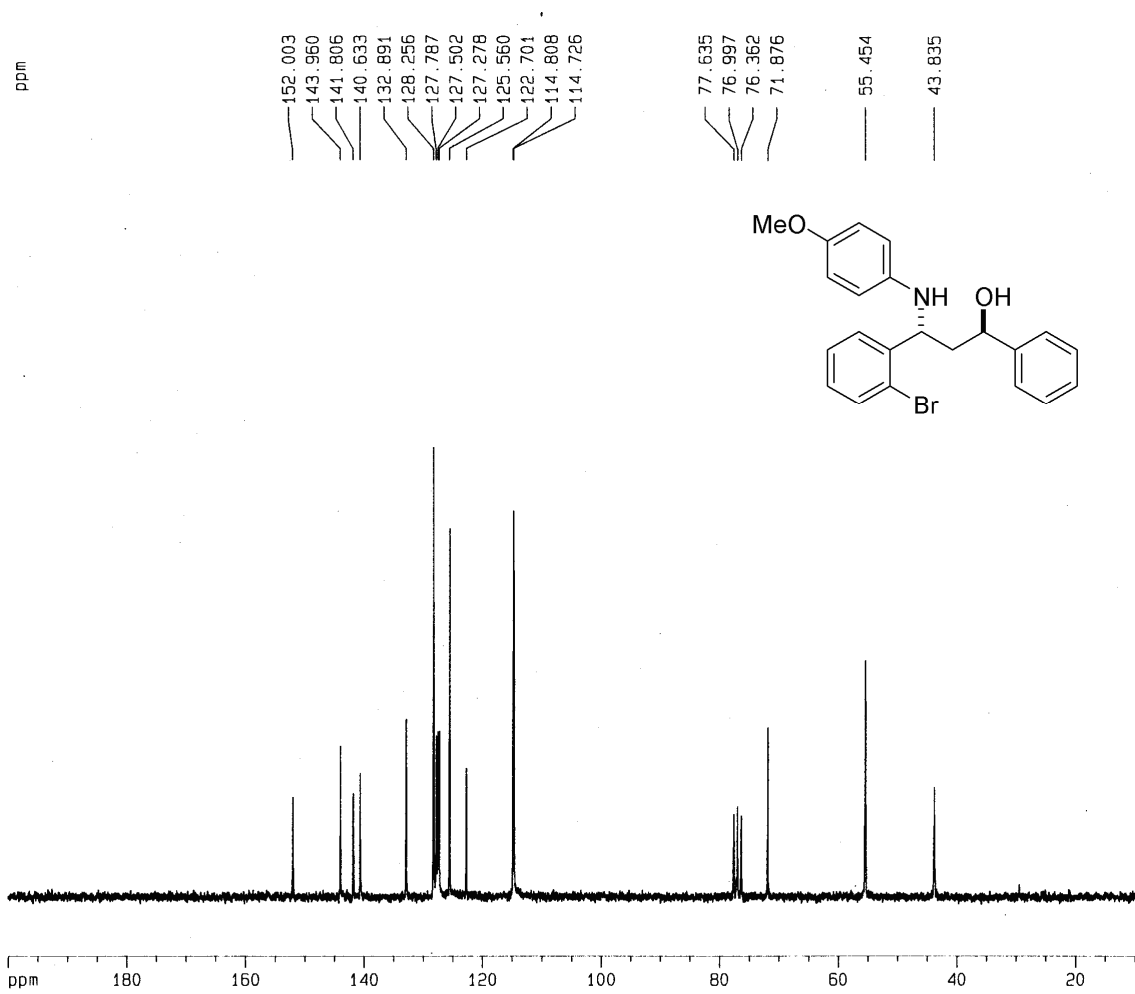

# <sup>1</sup>H NMR of 5b

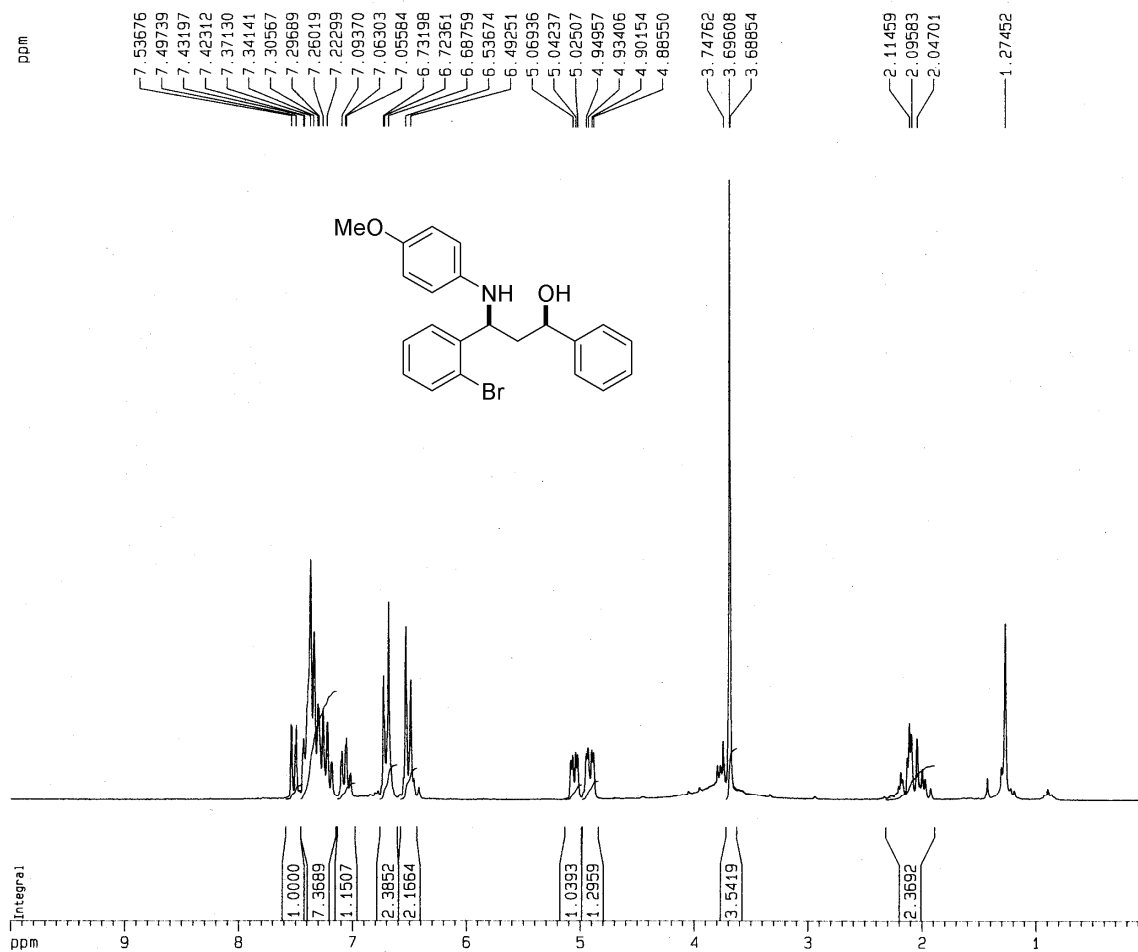

### <sup>13</sup>C NMR of 5b

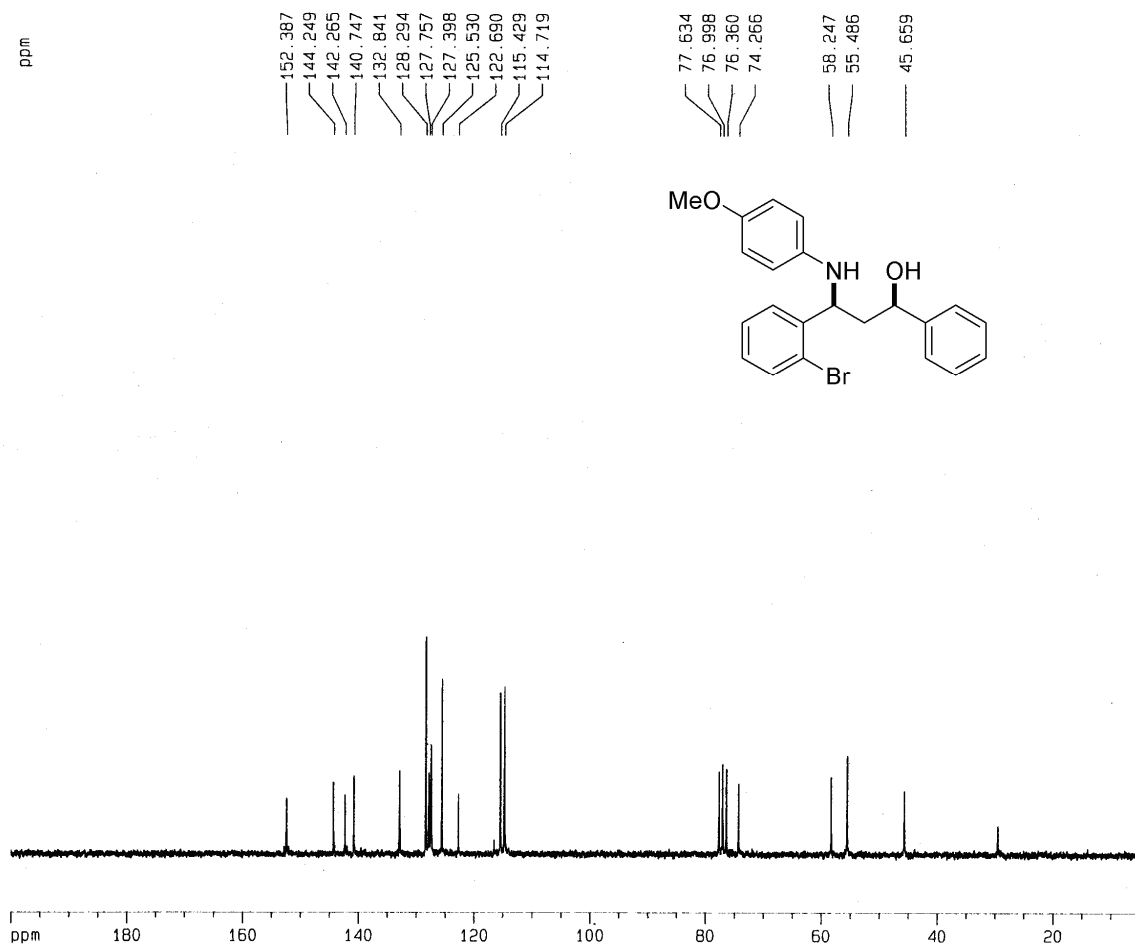



# <sup>1</sup>H NMR of 6a

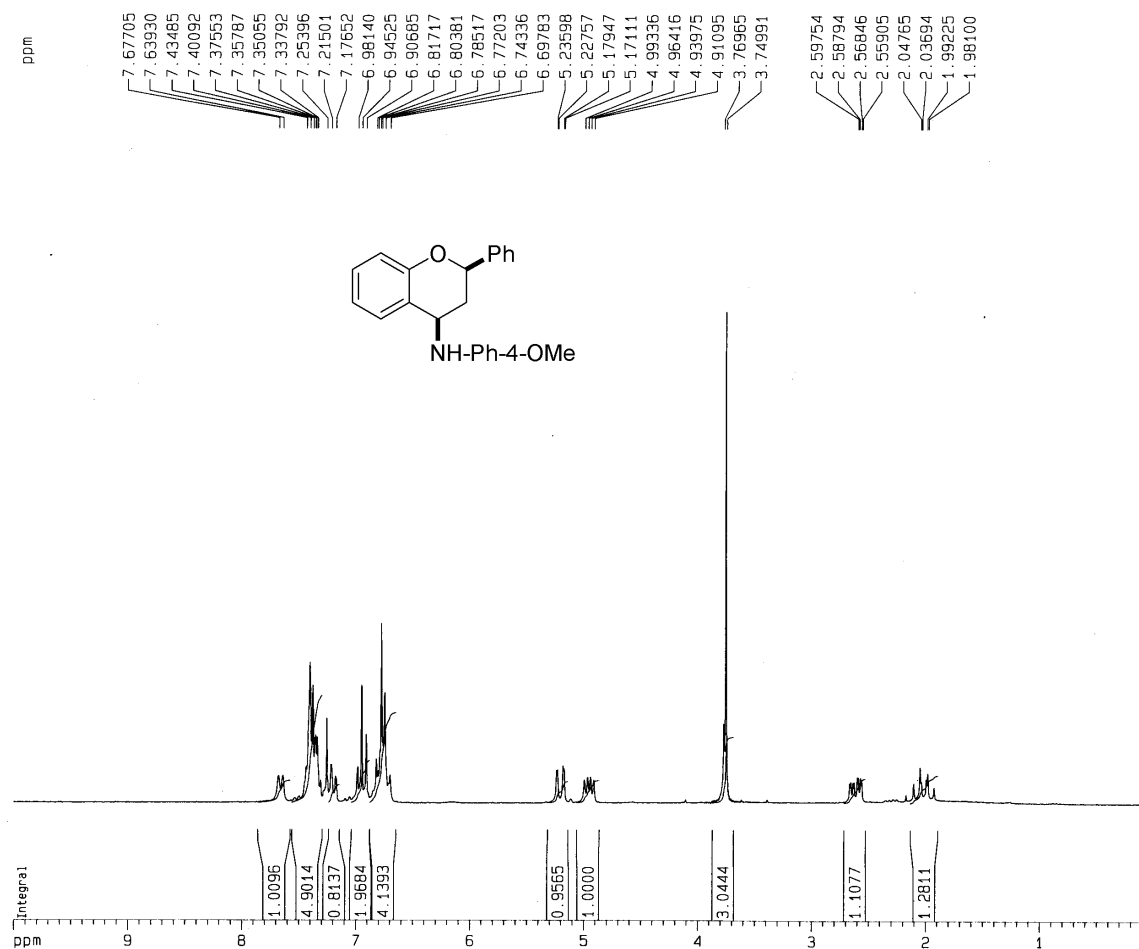

### <sup>13</sup>C NMR of 6a

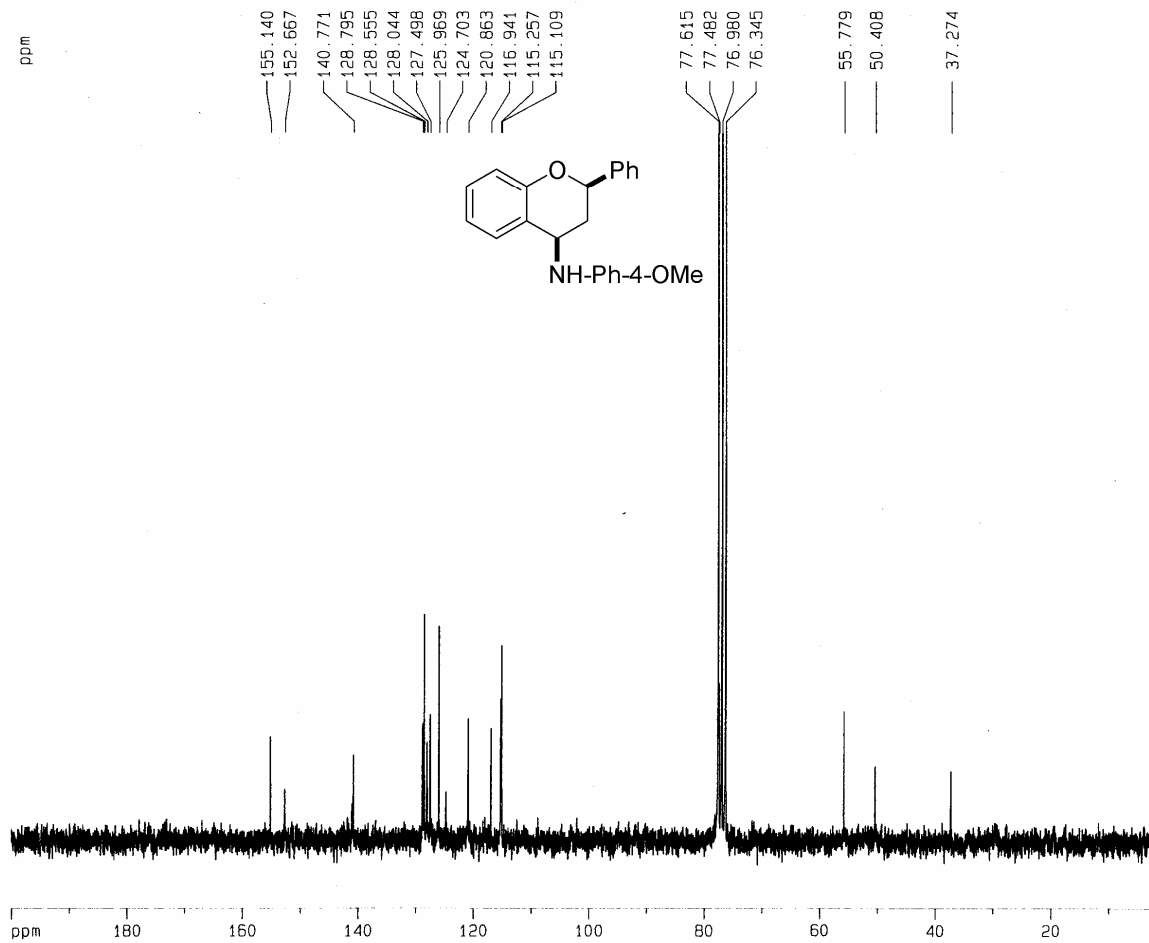

# <sup>1</sup>H NMR of 6b

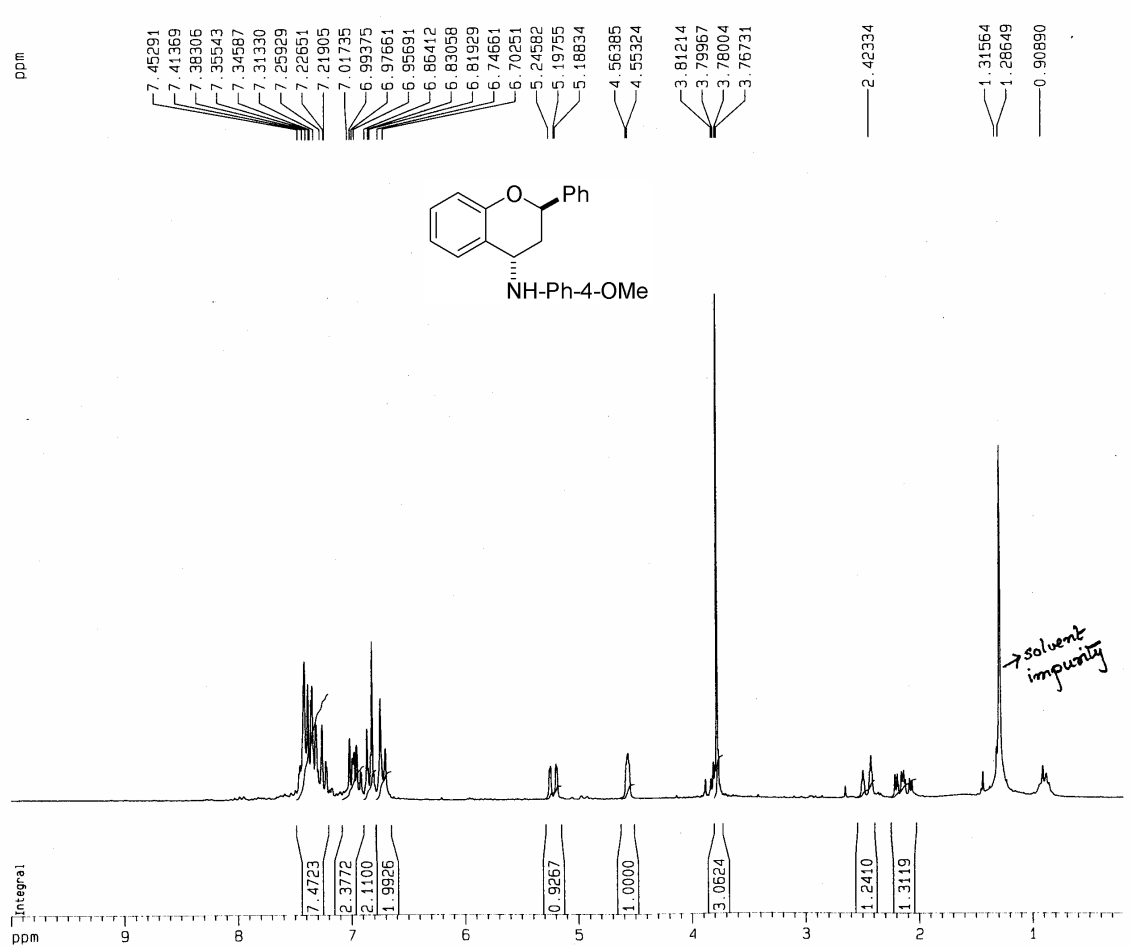

### <sup>13</sup>C NMR of 6b

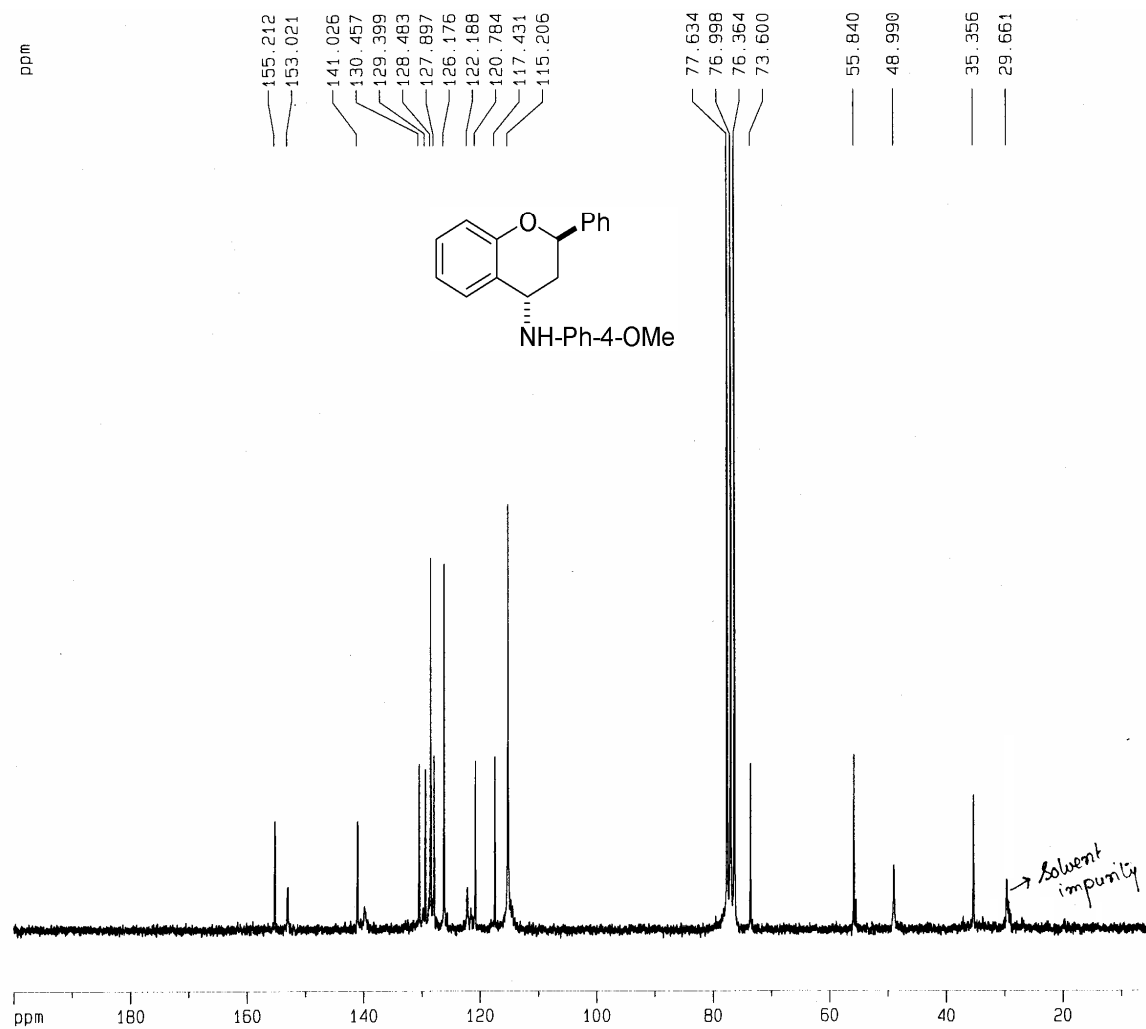

## (II) Crystal Structure of **6a**

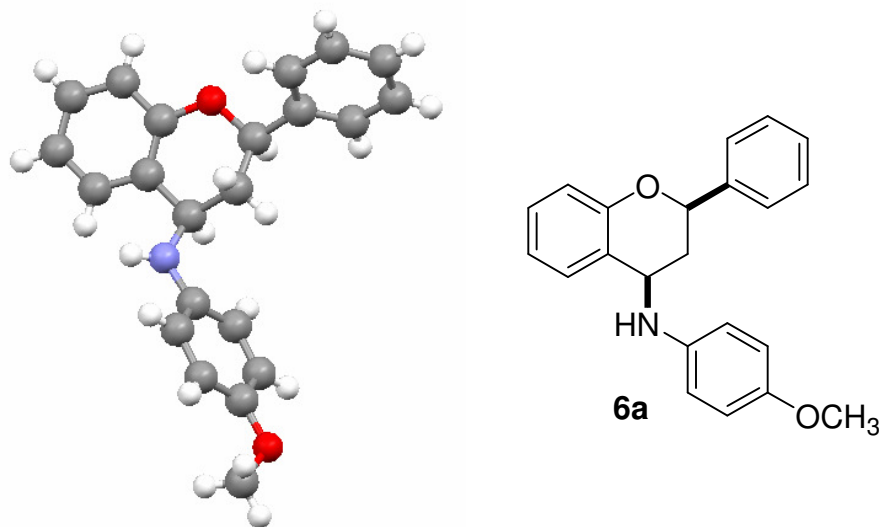

Crystal data and structure refinement for **6a**.

|                             |                                                                                                               |
|-----------------------------|---------------------------------------------------------------------------------------------------------------|
| Identification code         | barc025                                                                                                       |
| Empirical formula           | C <sub>22</sub> H <sub>21</sub> N O <sub>2</sub>                                                              |
| Formula weight              | 331.40                                                                                                        |
| Temperature                 | 293(2) K                                                                                                      |
| Wavelength                  | 0.71073 Å                                                                                                     |
| Crystal system, space group | Orthorhombic, P c a b                                                                                         |
| Unit cell dimensions        | a = 8.5808(7) Å    alpha = 90 deg.<br>b = 46.211(4) Å    beta = 90 deg.<br>c = 8.7745(8) Å    gamma = 90 deg. |
| Volume                      | 3479.3(5) Å <sup>3</sup>                                                                                      |
| Z, Calculated density       | 8, 1.265 Mg/m <sup>3</sup>                                                                                    |
| Absorption coefficient      | 0.081 mm <sup>-1</sup>                                                                                        |
| F(000)                      | 1408                                                                                                          |

|                                   |                                             |
|-----------------------------------|---------------------------------------------|
| Crystal size                      | 0.32 x 0.28 x 0.23 mm                       |
| Theta range for data collection   | 3.35 to 25.00 deg.                          |
| Limiting indices                  | -10<=h<=10, -54<=k<=54, -8<=l<=10           |
| Reflections collected / unique    | 24296 / 3063 [R(int) = 0.0859]              |
| Completeness to theta = 25.00     | 99.8 %                                      |
| Absorption correction             | Semi-empirical from equivalents             |
| Max. and min. transmission        | 0.9817 and 0.9747                           |
| Refinement method                 | Full-matrix least-squares on F <sup>2</sup> |
| Data / restraints / parameters    | 3063 / 0 / 227                              |
| Goodness-of-fit on F <sup>2</sup> | 0.862                                       |
| Final R indices [I>2sigma(I)]     | R1 = 0.0497, wR2 = 0.0941                   |
| R indices (all data)              | R1 = 0.1316, wR2 = 0.1117                   |
| Largest diff. peak and hole       | 0.251 and -0.235 e.A <sup>-3</sup>          |

Table 2. Atomic coordinates ( $\times 10^4$ ) and equivalent isotropic displacement parameters ( $\text{\AA}^2 \times 10^3$ ) for barc025.  $U(\text{eq})$  is defined as one third of the trace of the orthogonalized  $U_{ij}$  tensor.

|       | x        | y       | z        | $U(\text{eq})$ |
|-------|----------|---------|----------|----------------|
| O(1)  | 91(2)    | 1742(1) | 6505(2)  | 65(1)          |
| O(2)  | 413(2)   | 187(1)  | 12771(2) | 80(1)          |
| N(1)  | -428(2)  | 867(1)  | 7609(2)  | 59(1)          |
| C(1)  | -65(3)   | 1531(1) | 5416(3)  | 54(1)          |
| C(2)  | -406(3)  | 1630(1) | 3961(4)  | 68(1)          |
| C(3)  | -595(3)  | 1440(1) | 2787(4)  | 73(1)          |
| C(4)  | -439(3)  | 1147(1) | 3048(3)  | 70(1)          |
| C(5)  | -106(3)  | 1049(1) | 4497(3)  | 60(1)          |
| C(6)  | 81(2)    | 1238(1) | 5711(3)  | 49(1)          |
| C(7)  | 421(3)   | 1134(1) | 7308(3)  | 51(1)          |
| C(8)  | 50(3)    | 1371(1) | 8452(3)  | 55(1)          |
| C(9)  | 704(3)   | 1658(1) | 7952(3)  | 56(1)          |
| C(10) | 350(3)   | 1899(1) | 9034(3)  | 53(1)          |
| C(11) | 1342(3)  | 1967(1) | 10206(3) | 67(1)          |
| C(12) | 988(4)   | 2176(1) | 11271(4) | 80(1)          |
| C(13) | -374(4)  | 2323(1) | 11152(4) | 90(1)          |
| C(14) | -1381(4) | 2264(1) | 9976(4)  | 98(1)          |
| C(15) | -1024(3) | 2053(1) | 8924(4)  | 78(1)          |
| C(16) | -234(3)  | 713(1)  | 8967(3)  | 47(1)          |
| C(17) | -1436(3) | 542(1)  | 9491(3)  | 54(1)          |
| C(18) | -1273(3) | 365(1)  | 10744(3) | 56(1)          |
| C(19) | 129(3)   | 356(1)  | 11512(3) | 55(1)          |
| C(20) | 1316(3)  | 532(1)  | 11030(3) | 58(1)          |
| C(21) | 1149(3)  | 707(1)  | 9774(3)  | 55(1)          |
| C(22) | -638(3)  | -46(1)  | 13041(3) | 72(1)          |

Table 3. Bond lengths [Å] and angles [deg] for barc025.

---

|             |          |
|-------------|----------|
| O(1)-C(1)   | 1.375(3) |
| O(1)-C(9)   | 1.428(3) |
| O(2)-C(19)  | 1.374(3) |
| O(2)-C(22)  | 1.424(3) |
| N(1)-C(16)  | 1.399(3) |
| N(1)-C(7)   | 1.456(3) |
| N(1)-H(1)   | 0.8600   |
| C(1)-C(6)   | 1.385(3) |
| C(1)-C(2)   | 1.388(3) |
| C(2)-C(3)   | 1.365(4) |
| C(2)-H(2)   | 0.9300   |
| C(3)-C(4)   | 1.380(4) |
| C(3)-H(3)   | 0.9300   |
| C(4)-C(5)   | 1.380(3) |
| C(4)-H(4)   | 0.9300   |
| C(5)-C(6)   | 1.386(3) |
| C(5)-H(5)   | 0.9300   |
| C(6)-C(7)   | 1.509(3) |
| C(7)-C(8)   | 1.520(3) |
| C(7)-H(7)   | 0.9800   |
| C(8)-C(9)   | 1.507(3) |
| C(8)-H(8A)  | 0.9700   |
| C(8)-H(8B)  | 0.9700   |
| C(9)-C(10)  | 1.492(3) |
| C(9)-H(9)   | 0.9800   |
| C(10)-C(11) | 1.372(3) |
| C(10)-C(15) | 1.381(3) |
| C(11)-C(12) | 1.378(4) |
| C(11)-H(11) | 0.9300   |
| C(12)-C(13) | 1.356(4) |
| C(12)-H(12) | 0.9300   |
| C(13)-C(14) | 1.373(4) |
| C(13)-H(13) | 0.9300   |
| C(14)-C(15) | 1.376(4) |
| C(14)-H(14) | 0.9300   |
| C(15)-H(15) | 0.9300   |
| C(16)-C(17) | 1.377(3) |
| C(16)-C(21) | 1.382(3) |
| C(17)-C(18) | 1.376(3) |
| C(17)-H(17) | 0.9300   |
| C(18)-C(19) | 1.379(3) |
| C(18)-H(18) | 0.9300   |



|                  |          |
|------------------|----------|
| C(19)-C(20)      | 1.371(3) |
| C(20)-C(21)      | 1.374(3) |
| C(20)-H(20)      | 0.9300   |
| C(21)-H(21)      | 0.9300   |
| C(22)-H(22A)     | 0.9600   |
| C(22)-H(22B)     | 0.9600   |
| C(22)-H(22C)     | 0.9600   |
|                  |          |
| C(1)-O(1)-C(9)   | 117.4(2) |
| C(19)-O(2)-C(22) | 116.8(2) |
| C(16)-N(1)-C(7)  | 121.8(2) |
| C(16)-N(1)-H(1)  | 119.1    |
| C(7)-N(1)-H(1)   | 119.1    |
| O(1)-C(1)-C(6)   | 123.9(2) |
| O(1)-C(1)-C(2)   | 115.1(3) |
| C(6)-C(1)-C(2)   | 121.1(3) |
| C(3)-C(2)-C(1)   | 120.3(3) |
| C(3)-C(2)-H(2)   | 119.8    |
| C(1)-C(2)-H(2)   | 119.8    |
| C(2)-C(3)-C(4)   | 119.7(3) |
| C(2)-C(3)-H(3)   | 120.1    |
| C(4)-C(3)-H(3)   | 120.1    |
| C(5)-C(4)-C(3)   | 119.7(3) |
| C(5)-C(4)-H(4)   | 120.2    |
| C(3)-C(4)-H(4)   | 120.2    |
| C(4)-C(5)-C(6)   | 121.7(3) |
| C(4)-C(5)-H(5)   | 119.1    |
| C(6)-C(5)-H(5)   | 119.1    |
| C(1)-C(6)-C(5)   | 117.4(2) |
| C(1)-C(6)-C(7)   | 120.1(2) |
| C(5)-C(6)-C(7)   | 122.4(2) |
| N(1)-C(7)-C(6)   | 109.9(2) |
| N(1)-C(7)-C(8)   | 112.7(2) |
| C(6)-C(7)-C(8)   | 110.1(2) |
| N(1)-C(7)-H(7)   | 108.0    |
| C(6)-C(7)-H(7)   | 108.0    |
| C(8)-C(7)-H(7)   | 108.0    |
| C(9)-C(8)-C(7)   | 111.4(2) |
| C(9)-C(8)-H(8A)  | 109.3    |
| C(7)-C(8)-H(8A)  | 109.3    |
| C(9)-C(8)-H(8B)  | 109.3    |
| C(7)-C(8)-H(8B)  | 109.3    |
| H(8A)-C(8)-H(8B) | 108.0    |
| O(1)-C(9)-C(10)  | 106.7(2) |
| O(1)-C(9)-C(8)   | 111.1(2) |
| C(10)-C(9)-C(8)  | 113.3(2) |

|                     |          |
|---------------------|----------|
| O(1)-C(9)-H(9)      | 108.5    |
| C(10)-C(9)-H(9)     | 108.5    |
| C(8)-C(9)-H(9)      | 108.5    |
| C(11)-C(10)-C(15)   | 117.6(3) |
| C(11)-C(10)-C(9)    | 121.4(2) |
| C(15)-C(10)-C(9)    | 120.9(2) |
| C(10)-C(11)-C(12)   | 122.2(3) |
| C(10)-C(11)-H(11)   | 118.9    |
| C(12)-C(11)-H(11)   | 118.9    |
| C(13)-C(12)-C(11)   | 119.3(3) |
| C(13)-C(12)-H(12)   | 120.4    |
| C(11)-C(12)-H(12)   | 120.4    |
| C(12)-C(13)-C(14)   | 120.0(3) |
| C(12)-C(13)-H(13)   | 120.0    |
| C(14)-C(13)-H(13)   | 120.0    |
| C(13)-C(14)-C(15)   | 120.4(3) |
| C(13)-C(14)-H(14)   | 119.8    |
| C(15)-C(14)-H(14)   | 119.8    |
| C(14)-C(15)-C(10)   | 120.5(3) |
| C(14)-C(15)-H(15)   | 119.7    |
| C(10)-C(15)-H(15)   | 119.7    |
| C(17)-C(16)-C(21)   | 117.4(2) |
| C(17)-C(16)-N(1)    | 119.2(2) |
| C(21)-C(16)-N(1)    | 123.3(2) |
| C(18)-C(17)-C(16)   | 122.0(2) |
| C(18)-C(17)-H(17)   | 119.0    |
| C(16)-C(17)-H(17)   | 119.0    |
| C(17)-C(18)-C(19)   | 119.9(2) |
| C(17)-C(18)-H(18)   | 120.1    |
| C(19)-C(18)-H(18)   | 120.1    |
| C(20)-C(19)-O(2)    | 117.0(2) |
| C(20)-C(19)-C(18)   | 118.5(2) |
| O(2)-C(19)-C(18)    | 124.5(2) |
| C(19)-C(20)-C(21)   | 121.2(2) |
| C(19)-C(20)-H(20)   | 119.4    |
| C(21)-C(20)-H(20)   | 119.4    |
| C(20)-C(21)-C(16)   | 120.9(2) |
| C(20)-C(21)-H(21)   | 119.6    |
| C(16)-C(21)-H(21)   | 119.6    |
| O(2)-C(22)-H(22A)   | 109.5    |
| O(2)-C(22)-H(22B)   | 109.5    |
| H(22A)-C(22)-H(22B) | 109.5    |
| O(2)-C(22)-H(22C)   | 109.5    |
| H(22A)-C(22)-H(22C) | 109.5    |
| H(22B)-C(22)-H(22C) | 109.5    |

---

Symmetry transformations used to generate equivalent atoms:

Table 4. Anisotropic displacement parameters ( $\text{Å}^2 \times 10^3$ ) for barc025.

The anisotropic displacement factor exponent takes the form:

$$-2 \pi^2 [ h^2 a^{*2} U_{11} + \dots + 2 h k a^* b^* U_{12} ]$$

---

|       | U11    | U22   | U33    | U23    | U13    | U12    |
|-------|--------|-------|--------|--------|--------|--------|
| O(1)  | 89(1)  | 53(1) | 54(1)  | 11(1)  | 1(1)   | 2(1)   |
| O(2)  | 90(1)  | 76(2) | 74(2)  | 23(1)  | -14(1) | -18(1) |
| N(1)  | 68(1)  | 50(2) | 59(2)  | 6(1)   | -15(1) | -10(1) |
| C(1)  | 49(2)  | 59(2) | 54(2)  | 6(2)   | 10(2)  | 0(1)   |
| C(2)  | 72(2)  | 72(2) | 58(2)  | 15(2)  | 9(2)   | 4(2)   |
| C(3)  | 69(2)  | 98(3) | 53(2)  | 10(2)  | 10(2)  | 2(2)   |
| C(4)  | 64(2)  | 93(3) | 54(2)  | -10(2) | 6(2)   | 2(2)   |
| C(5)  | 53(2)  | 62(2) | 66(2)  | -2(2)  | 9(2)   | 4(1)   |
| C(6)  | 43(2)  | 52(2) | 51(2)  | 3(2)   | 6(1)   | 6(1)   |
| C(7)  | 46(1)  | 45(2) | 62(2)  | 4(2)   | 1(1)   | 1(1)   |
| C(8)  | 58(2)  | 54(2) | 54(2)  | 15(2)  | 3(1)   | 2(1)   |
| C(9)  | 56(2)  | 51(2) | 60(2)  | 8(2)   | 1(1)   | 1(1)   |
| C(10) | 55(2)  | 44(2) | 59(2)  | 6(1)   | 2(2)   | -5(1)  |
| C(11) | 72(2)  | 61(2) | 69(2)  | 7(2)   | -6(2)  | -1(2)  |
| C(12) | 99(3)  | 73(2) | 67(2)  | 5(2)   | -13(2) | -20(2) |
| C(13) | 113(3) | 71(2) | 85(3)  | -15(2) | 9(2)   | -11(2) |
| C(14) | 88(2)  | 97(3) | 110(3) | -31(2) | -2(2)  | 25(2)  |
| C(15) | 65(2)  | 85(2) | 84(2)  | -17(2) | -3(2)  | 9(2)   |
| C(16) | 48(2)  | 38(2) | 54(2)  | 2(1)   | 0(1)   | 2(1)   |
| C(17) | 50(2)  | 56(2) | 55(2)  | -3(2)  | -8(1)  | -2(1)  |
| C(18) | 56(2)  | 57(2) | 56(2)  | 1(2)   | 7(2)   | -9(1)  |
| C(19) | 65(2)  | 45(2) | 54(2)  | 9(2)   | -6(2)  | -2(2)  |
| C(20) | 55(2)  | 48(2) | 72(2)  | 4(2)   | -16(2) | -2(1)  |
| C(21) | 47(2)  | 45(2) | 74(2)  | 6(2)   | -2(2)  | -5(1)  |
| C(22) | 87(2)  | 54(2) | 76(2)  | 15(2)  | 8(2)   | -6(2)  |

---

Table 5. Hydrogen coordinates (  $\times 10^4$ ) and isotropic displacement parameters ( $\text{Å}^2 \times 10^3$ ) for barc025.

|        | x     | y    | z     | U(eq) |
|--------|-------|------|-------|-------|
| H(1)   | -1066 | 803  | 6934  | 71    |
| H(2)   | -505  | 1828 | 3786  | 81    |
| H(3)   | -829  | 1507 | 1815  | 88    |
| H(4)   | -558  | 1016 | 2251  | 84    |
| H(5)   | -3    | 851  | 4664  | 72    |
| H(7)   | 1537  | 1092 | 7376  | 61    |
| H(8A)  | -1071 | 1387 | 8565  | 66    |
| H(8B)  | 484   | 1320 | 9436  | 66    |
| H(9)   | 1838  | 1640 | 7862  | 67    |
| H(11)  | 2285  | 1869 | 10284 | 80    |
| H(12)  | 1676  | 2216 | 12062 | 95    |
| H(13)  | -627  | 2465 | 11866 | 107   |
| H(14)  | -2309 | 2367 | 9891  | 118   |
| H(15)  | -1714 | 2014 | 8132  | 94    |
| H(17)  | -2386 | 546  | 8983  | 64    |
| H(18)  | -2106 | 253  | 11073 | 67    |
| H(20)  | 2253  | 533  | 11564 | 70    |
| H(21)  | 1976  | 822  | 9462  | 66    |
| H(22A) | -1621 | 30   | 13379 | 109   |
| H(22B) | -216  | -171 | 13810 | 109   |
| H(22C) | -786  | -153 | 12116 | 109   |

Table 6. Torsion angles [deg] for barc025.

---

|                         |             |
|-------------------------|-------------|
| C(9)-O(1)-C(1)-C(6)     | 11.4(3)     |
| C(9)-O(1)-C(1)-C(2)     | -169.3(2)   |
| O(1)-C(1)-C(2)-C(3)     | -179.7(2)   |
| C(6)-C(1)-C(2)-C(3)     | -0.3(4)     |
| C(1)-C(2)-C(3)-C(4)     | -0.3(4)     |
| C(2)-C(3)-C(4)-C(5)     | 0.5(4)      |
| C(3)-C(4)-C(5)-C(6)     | -0.1(4)     |
| O(1)-C(1)-C(6)-C(5)     | -180.0(2)   |
| C(2)-C(1)-C(6)-C(5)     | 0.8(4)      |
| O(1)-C(1)-C(6)-C(7)     | 0.5(3)      |
| C(2)-C(1)-C(6)-C(7)     | -178.8(2)   |
| C(4)-C(5)-C(6)-C(1)     | -0.6(4)     |
| C(4)-C(5)-C(6)-C(7)     | 179.0(2)    |
| C(16)-N(1)-C(7)-C(6)    | 175.2(2)    |
| C(16)-N(1)-C(7)-C(8)    | -61.6(3)    |
| C(1)-C(6)-C(7)-N(1)     | 142.6(2)    |
| C(5)-C(6)-C(7)-N(1)     | -37.0(3)    |
| C(1)-C(6)-C(7)-C(8)     | 17.8(3)     |
| C(5)-C(6)-C(7)-C(8)     | -161.7(2)   |
| N(1)-C(7)-C(8)-C(9)     | -169.5(2)   |
| C(6)-C(7)-C(8)-C(9)     | -46.3(3)    |
| C(1)-O(1)-C(9)-C(10)    | -164.66(19) |
| C(1)-O(1)-C(9)-C(8)     | -40.7(3)    |
| C(7)-C(8)-C(9)-O(1)     | 59.1(3)     |
| C(7)-C(8)-C(9)-C(10)    | 179.3(2)    |
| O(1)-C(9)-C(10)-C(11)   | -146.6(2)   |
| C(8)-C(9)-C(10)-C(11)   | 90.8(3)     |
| O(1)-C(9)-C(10)-C(15)   | 35.9(3)     |
| C(8)-C(9)-C(10)-C(15)   | -86.7(3)    |
| C(15)-C(10)-C(11)-C(12) | 1.6(4)      |
| C(9)-C(10)-C(11)-C(12)  | -175.9(2)   |
| C(10)-C(11)-C(12)-C(13) | -1.0(4)     |
| C(11)-C(12)-C(13)-C(14) | -0.2(5)     |
| C(12)-C(13)-C(14)-C(15) | 0.7(5)      |
| C(13)-C(14)-C(15)-C(10) | 0.0(5)      |
| C(11)-C(10)-C(15)-C(14) | -1.1(4)     |
| C(9)-C(10)-C(15)-C(14)  | 176.4(3)    |
| C(7)-N(1)-C(16)-C(17)   | 153.3(2)    |
| C(7)-N(1)-C(16)-C(21)   | -31.1(3)    |
| C(21)-C(16)-C(17)-C(18) | -1.6(4)     |
| N(1)-C(16)-C(17)-C(18)  | 174.3(2)    |
| C(16)-C(17)-C(18)-C(19) | -0.1(4)     |

|                         |           |
|-------------------------|-----------|
| C(22)-O(2)-C(19)-C(20)  | -164.5(2) |
| C(22)-O(2)-C(19)-C(18)  | 17.7(4)   |
| C(17)-C(18)-C(19)-C(20) | 2.3(4)    |
| C(17)-C(18)-C(19)-O(2)  | -179.9(2) |
| O(2)-C(19)-C(20)-C(21)  | 179.4(2)  |
| C(18)-C(19)-C(20)-C(21) | -2.6(4)   |
| C(19)-C(20)-C(21)-C(16) | 0.9(4)    |
| C(17)-C(16)-C(21)-C(20) | 1.3(4)    |
| N(1)-C(16)-C(21)-C(20)  | -174.4(2) |

---

Symmetry transformations used to generate equivalent atoms:
